# Supplementary material
Source: ML conference proceedings conference paper supplement (https://openreview.net/forum?id=HF8gDPLjqx5)

Rotation of Target distributions

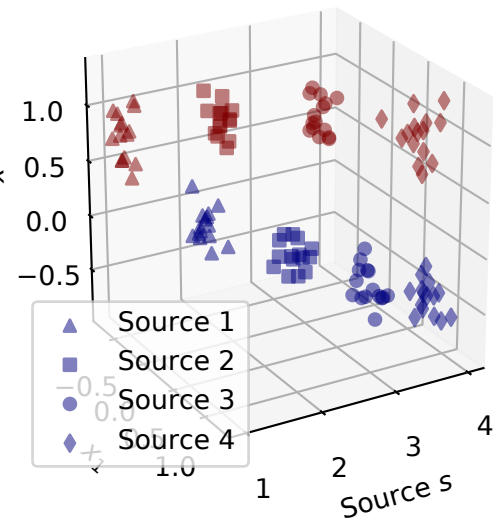

Sources and Target distributions

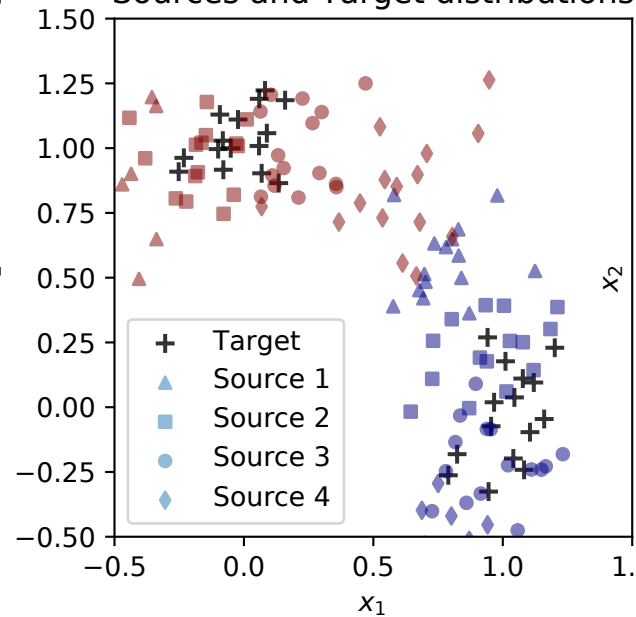

Reweighted Sources and Target

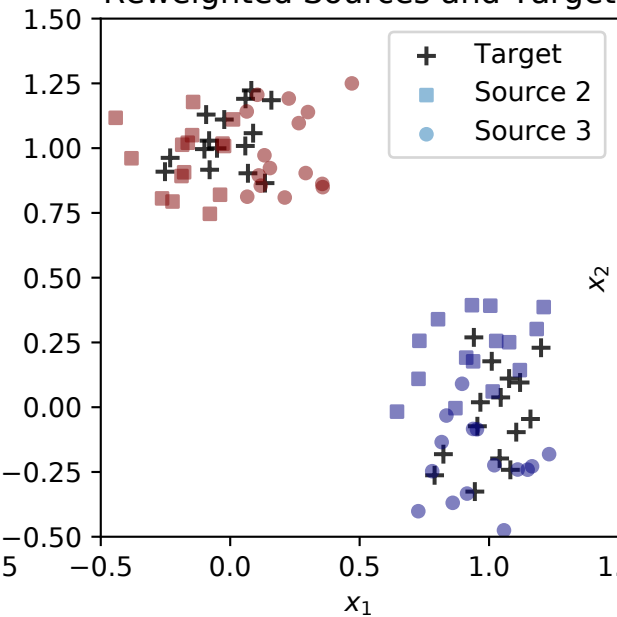

Estimated Target labels and Classifier

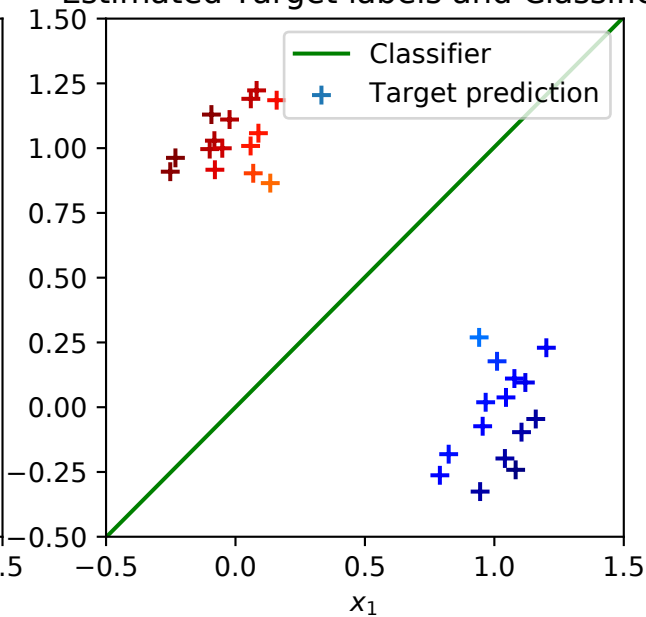

Supplement: supplementary_material [file attachment]
