# Supplementary material
Source: ML conference proceedings conference paper supplement (https://openreview.net/forum?id=HF8gDPLjqx5)

Data

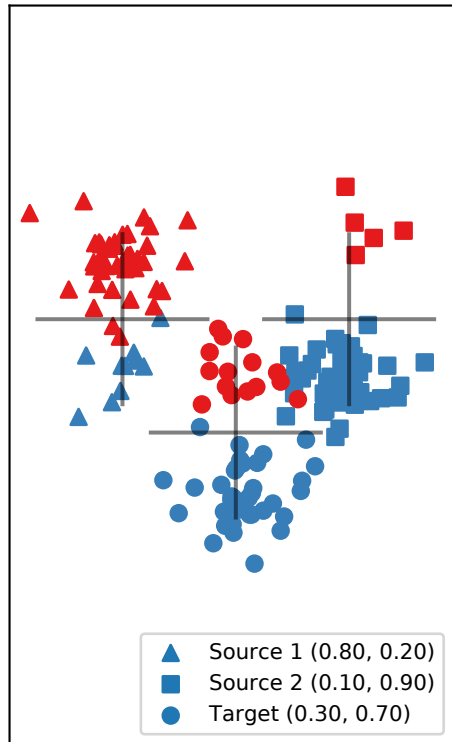

Reweighted Sources

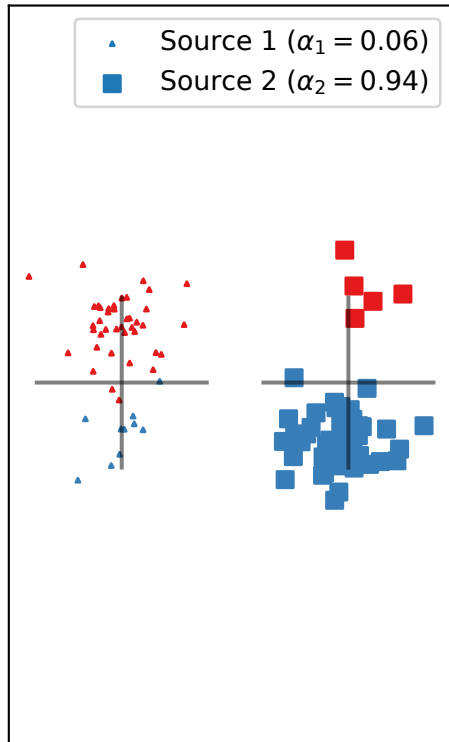

Estimated Target labels and Classifier

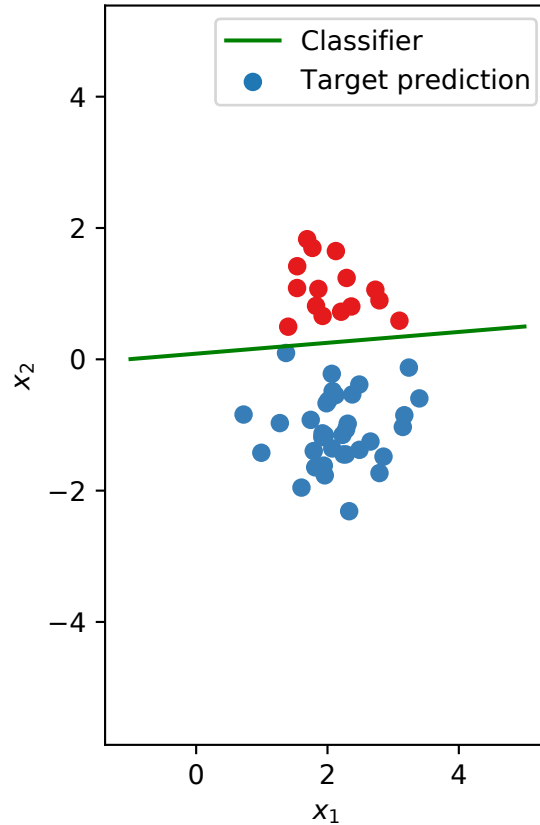

Accuracy

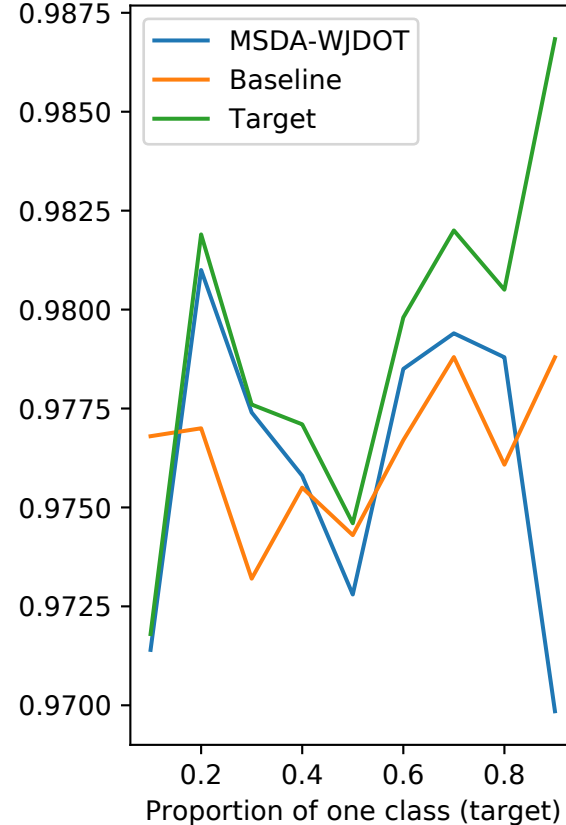 $\alpha$  coefficients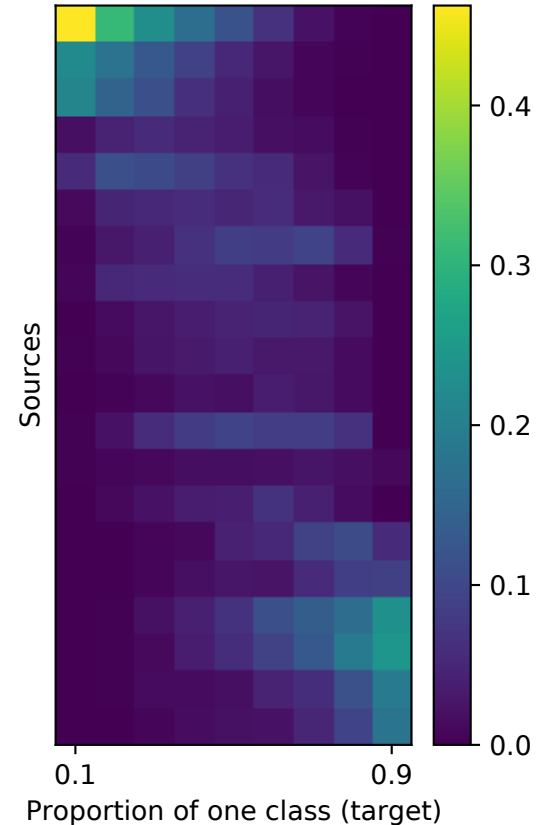

Supplement: supplementary_material [file attachment]
