# Supplementary material
Source: ML conference proceedings conference paper supplement (https://openreview.net/forum?id=HF8gDPLjqx5)

Data

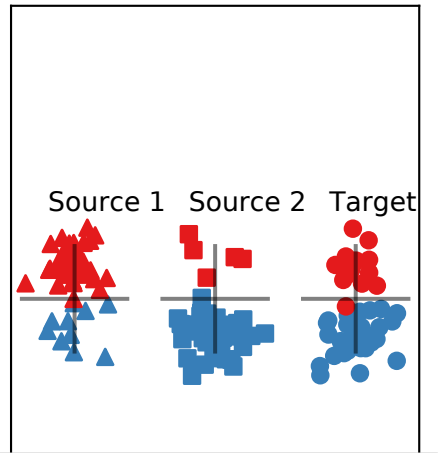

- ▲ Source 1 (0.92, 0.08)
- Source 2 (0.89, 0.11)
- Target (0.30, 0.70)

Reweighted Sources

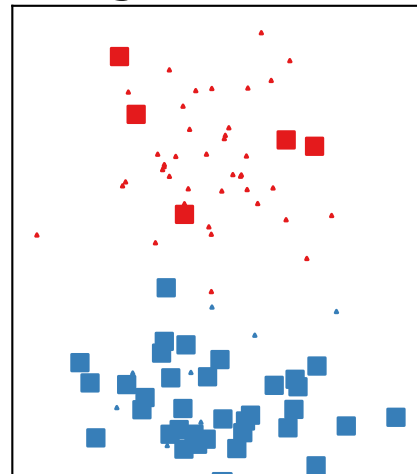

- Source 1 ( $\alpha_1 = 0.03$ )
- Source 1 ( $\alpha_1 = 0.97$ )

Classification

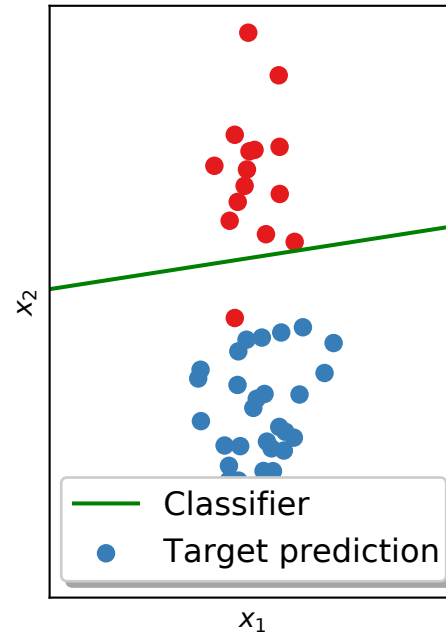

- Classifier
- Target prediction

Accuracy

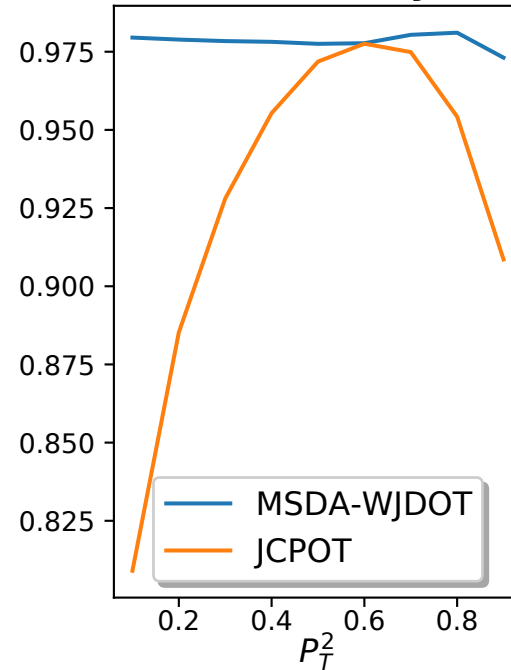

- MSDA-WJDOT
- JCPOT

 $\alpha$  coefficients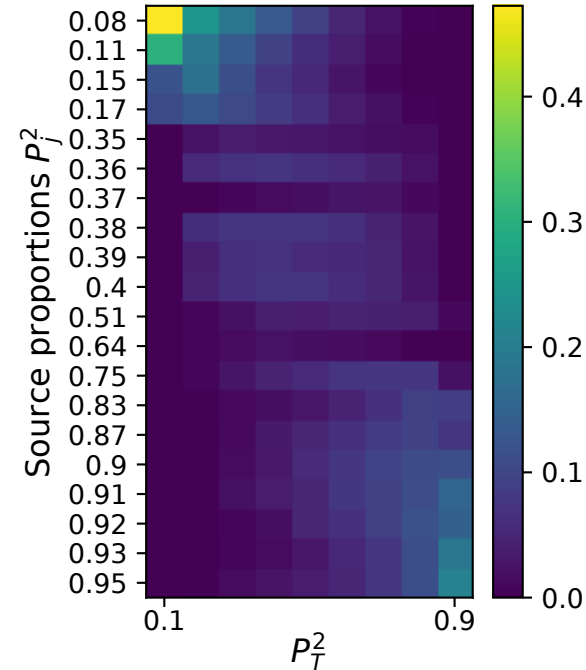

Supplement: supplementary_material [file attachment]
