# Supplementary material
Source: ML conference proceedings conference paper supplement (https://openreview.net/forum?id=HF8gDPLjqx5)

60 samples

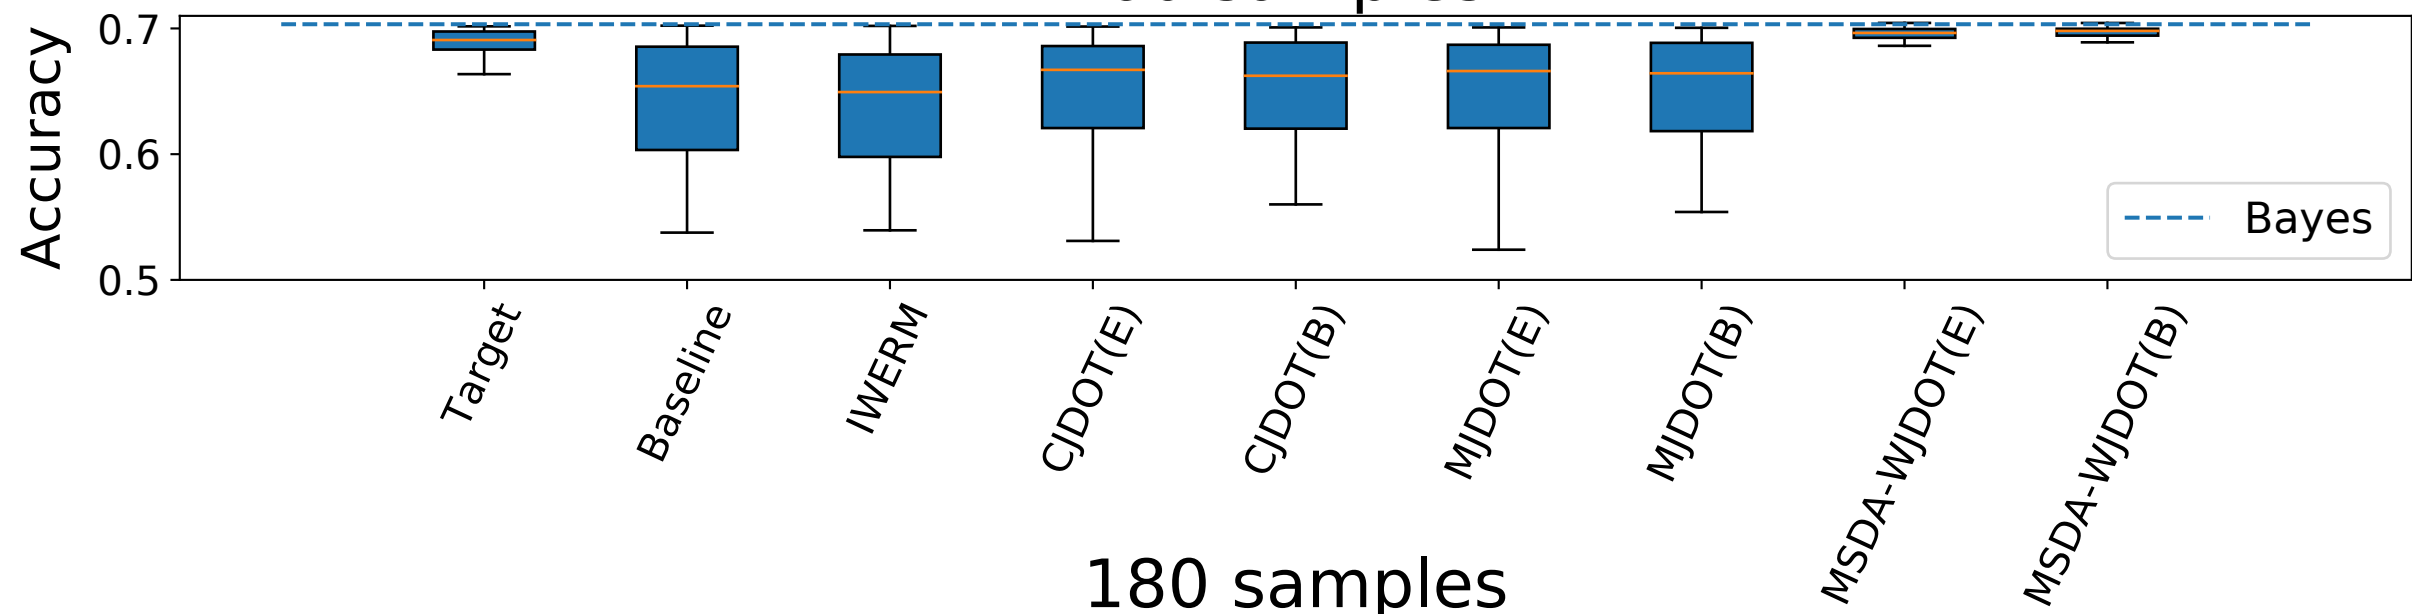

180 samples

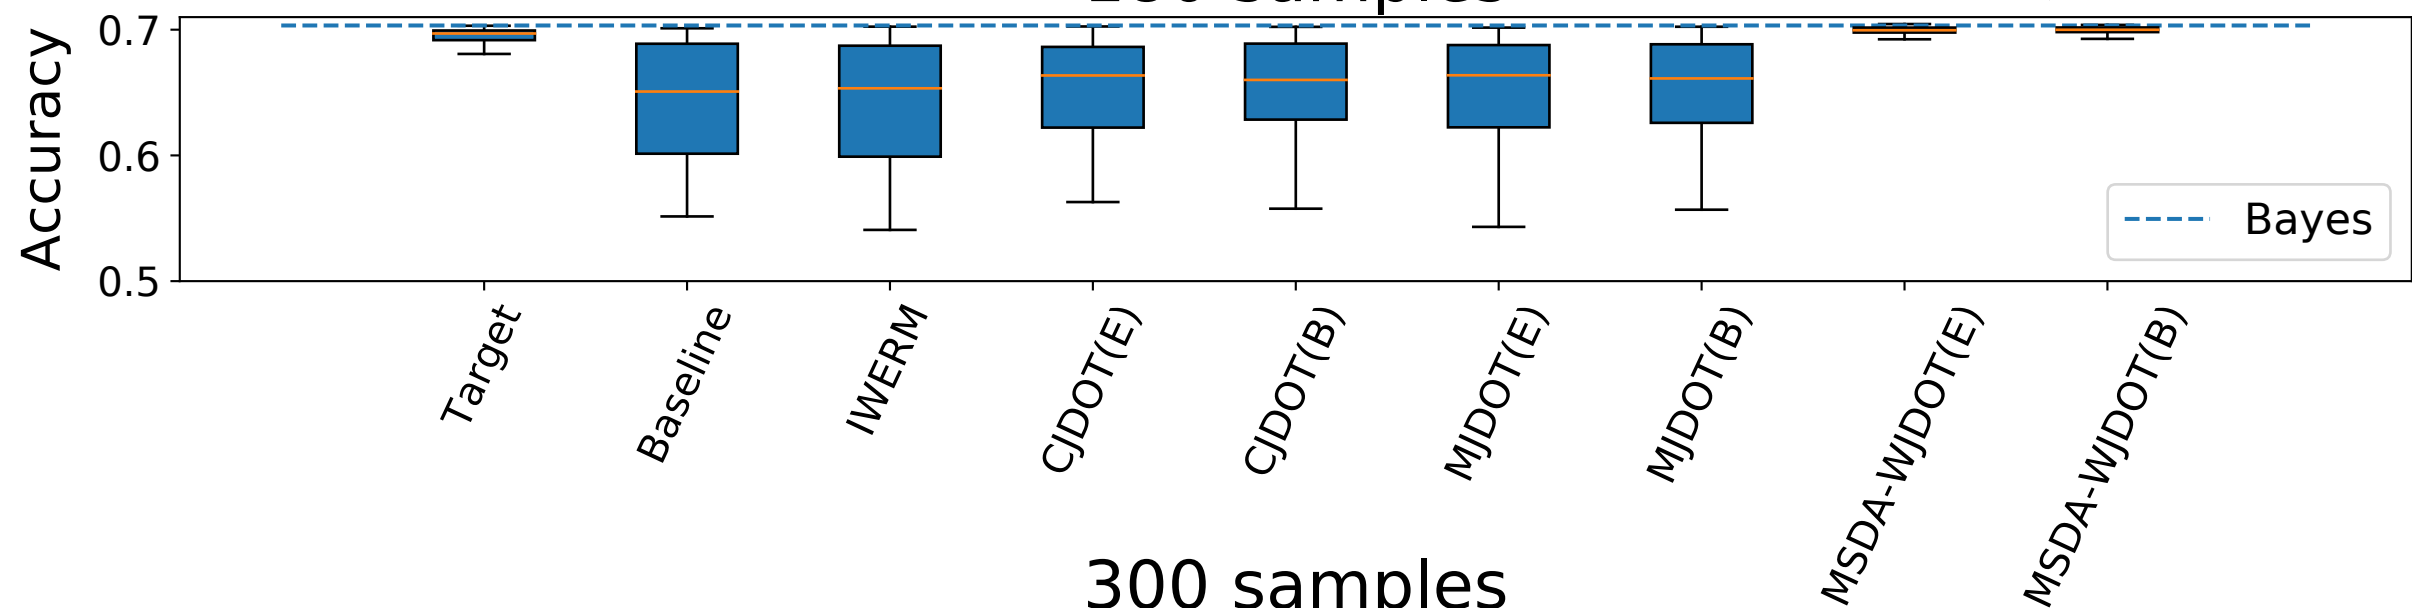

300 samples

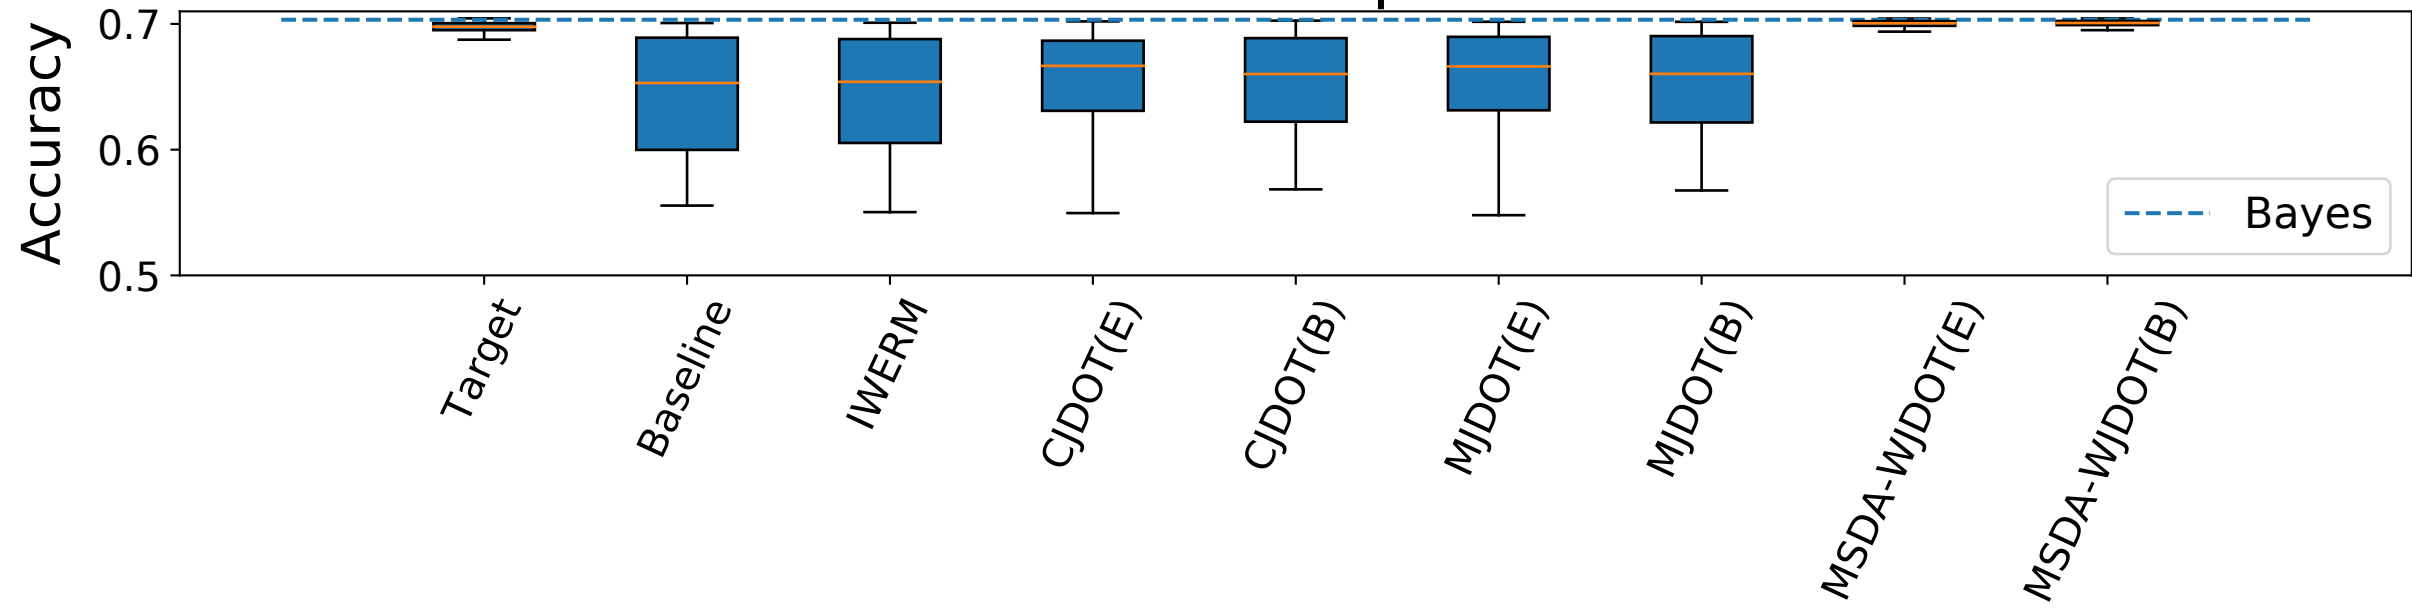

Supplement: supplementary_material [file attachment]

60 samples

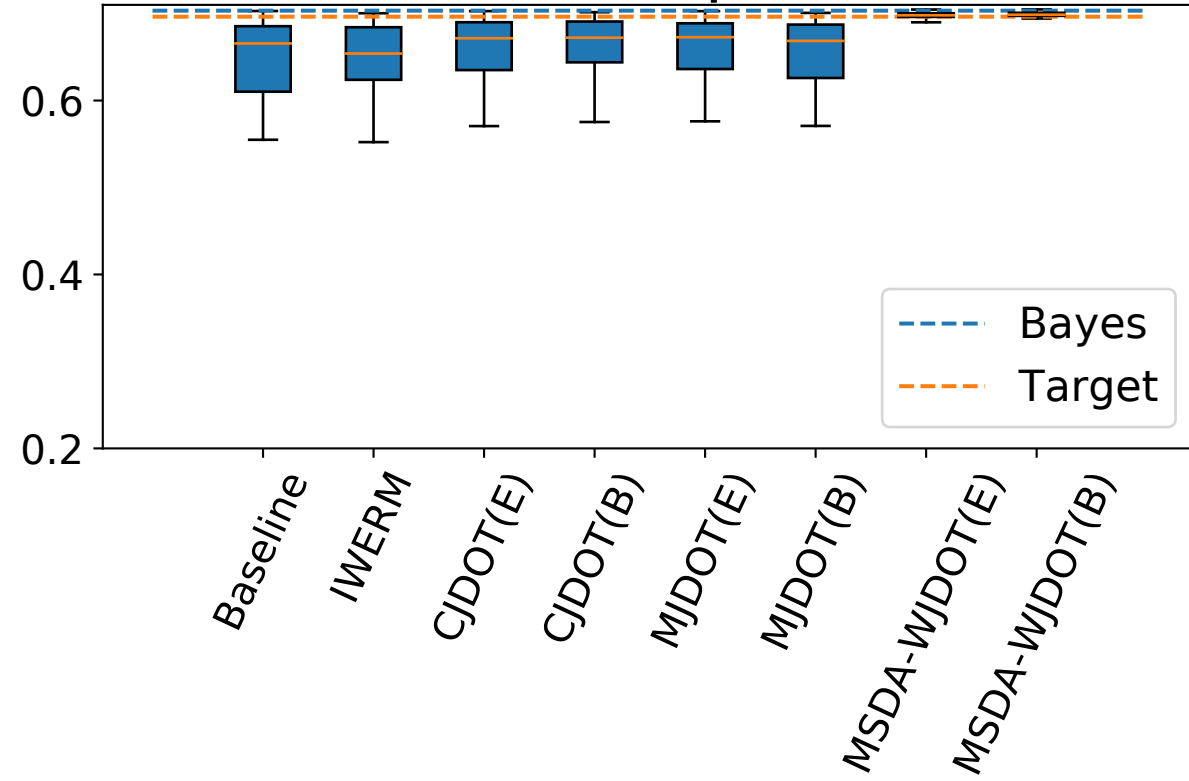

180 samples

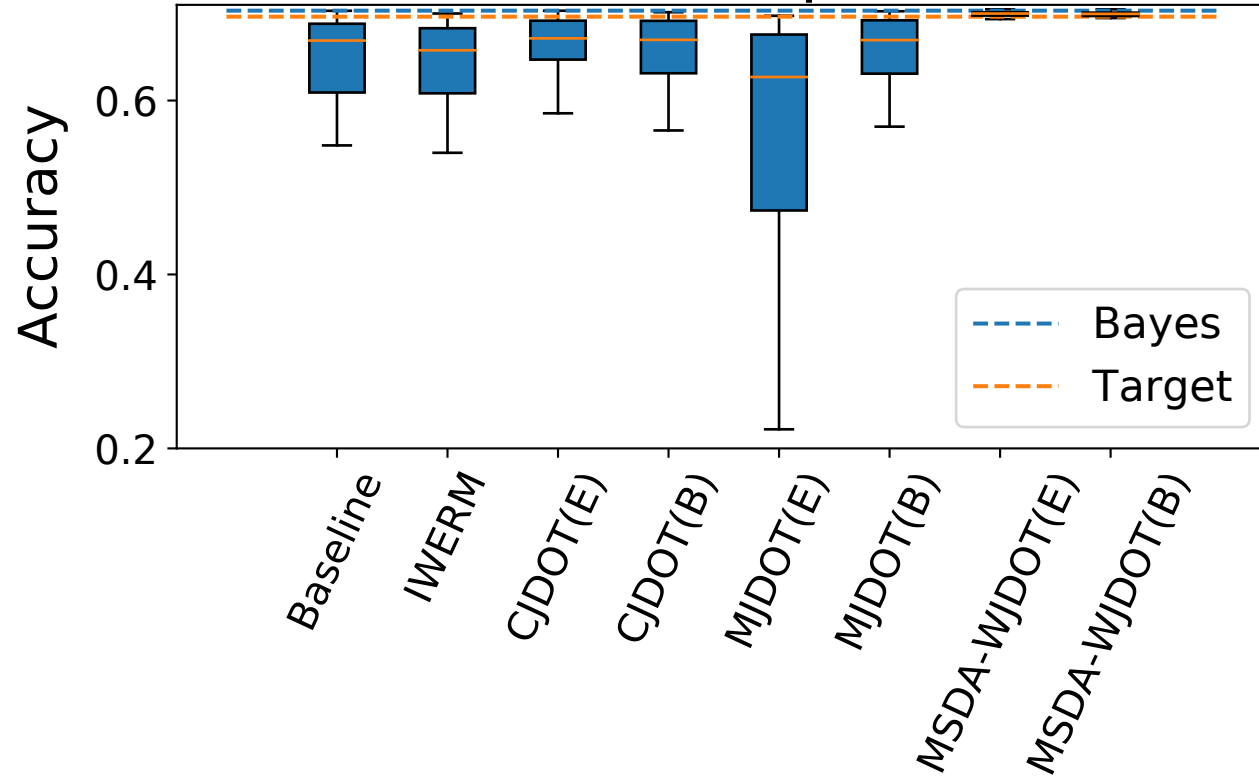

300 samples

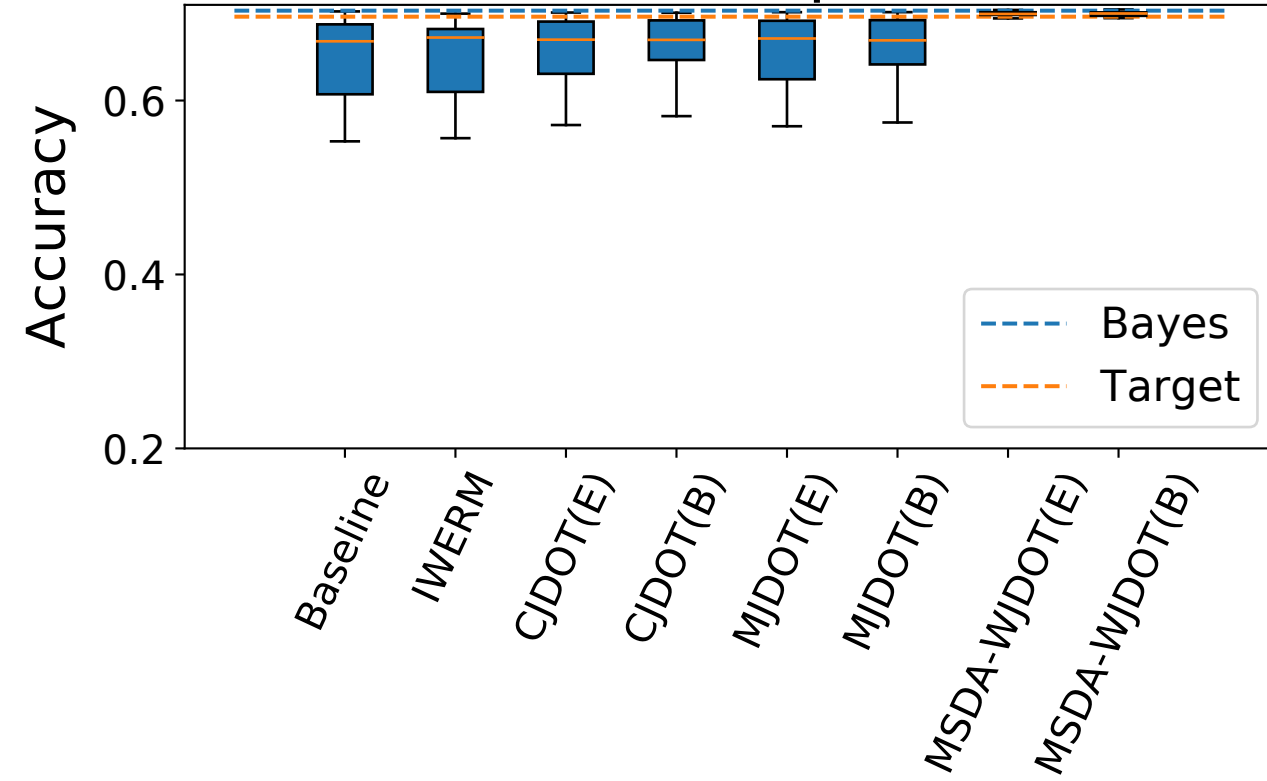

Supplement: supplementary_material [file attachment]

60 samples

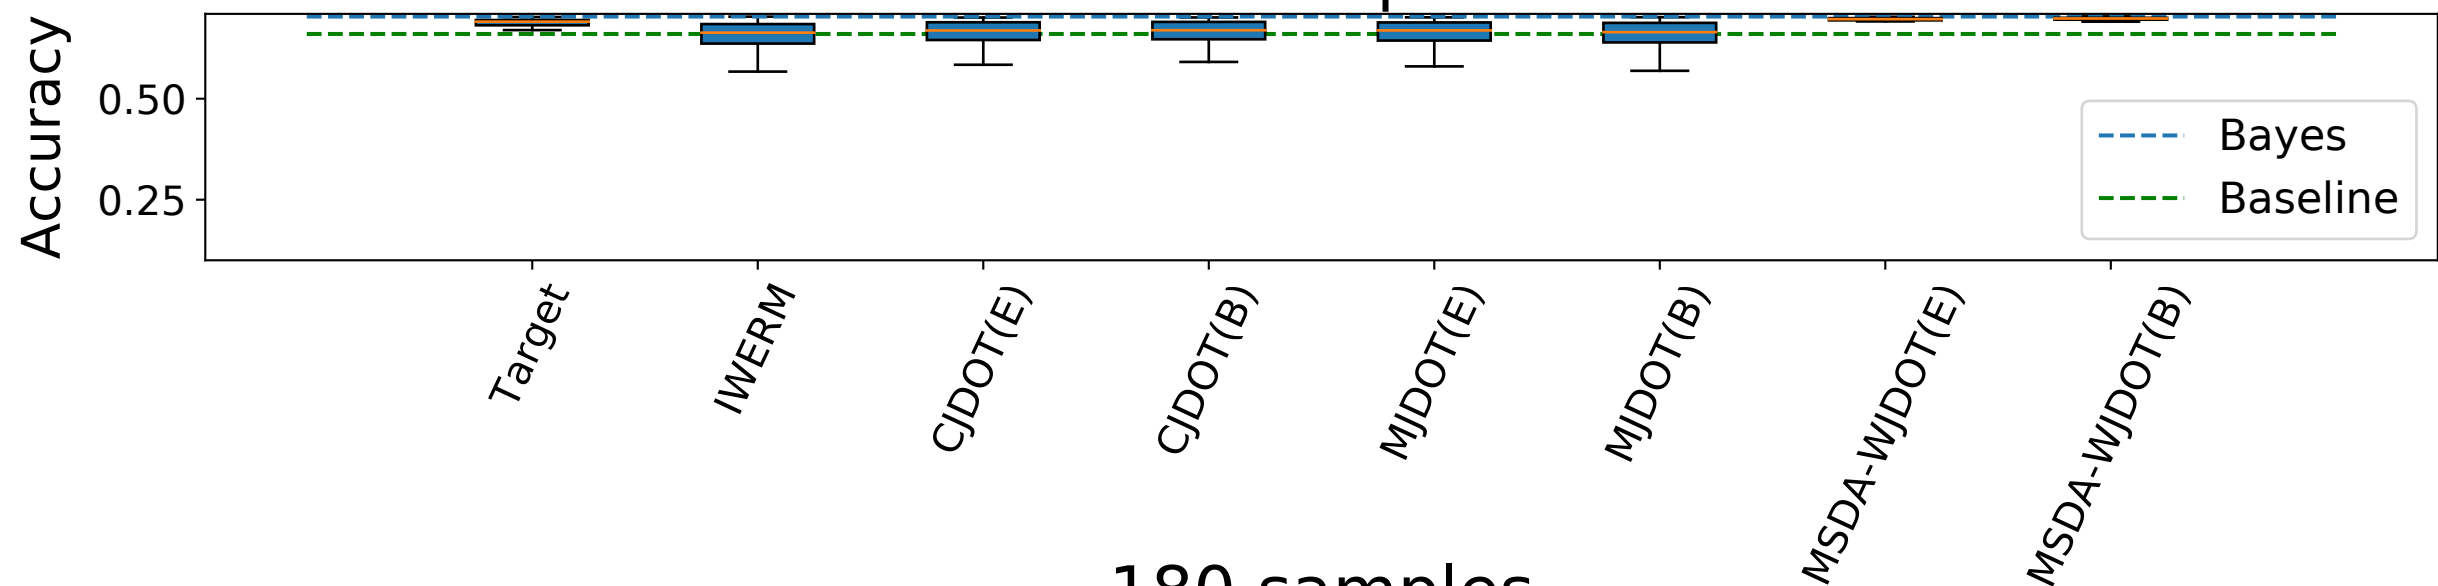

180 samples

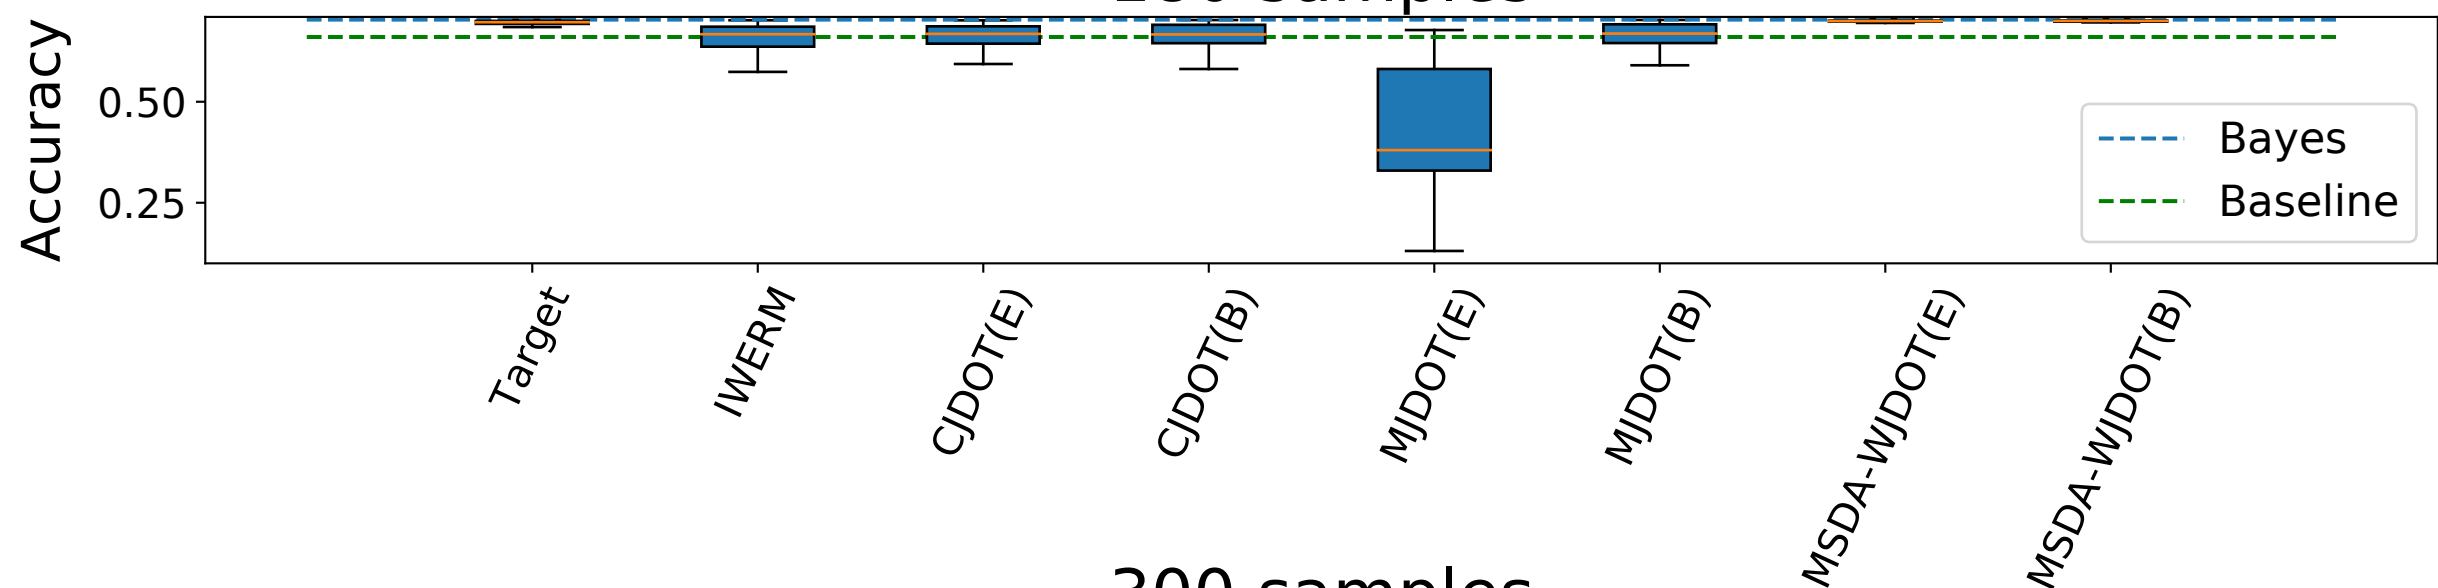

300 samples

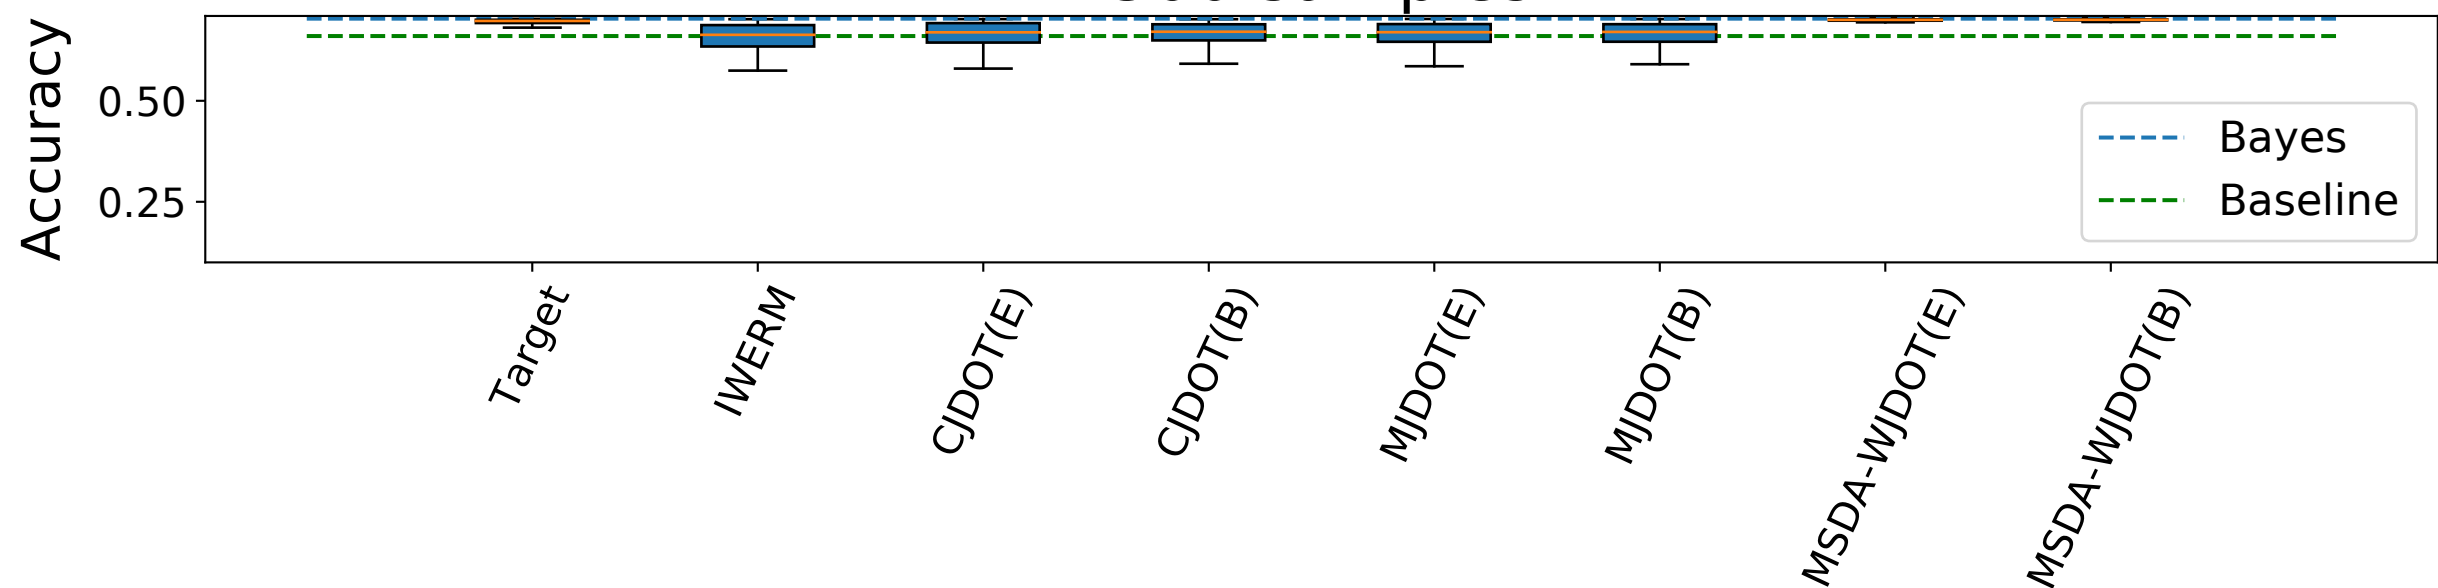

Supplement: supplementary_material [file attachment]

Data

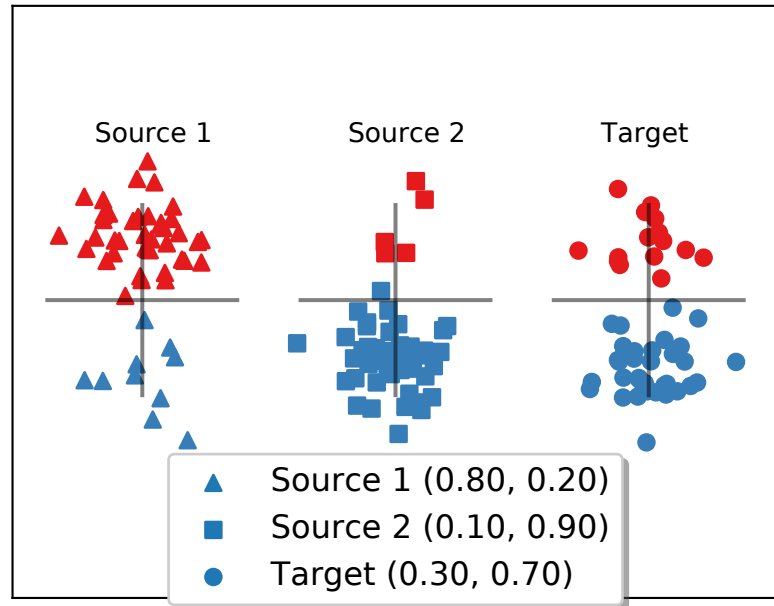

Weighted Sources and Classifier

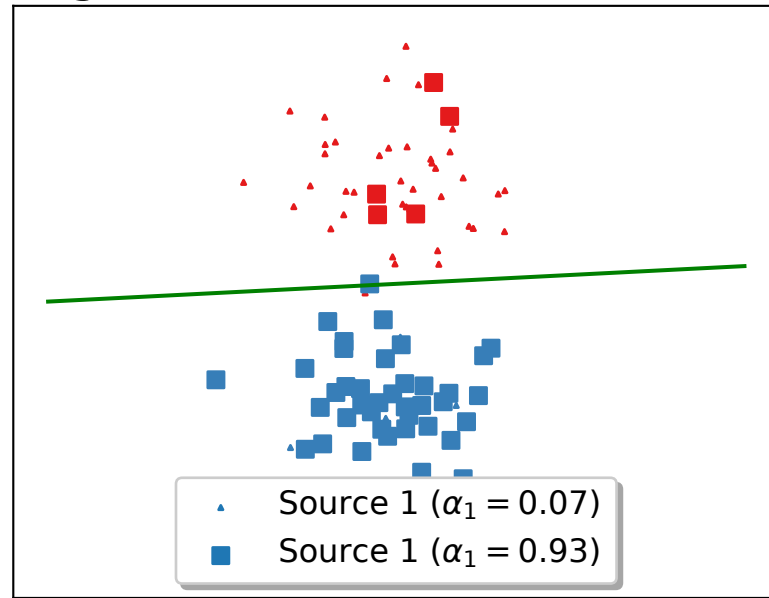 $\alpha$  coefficients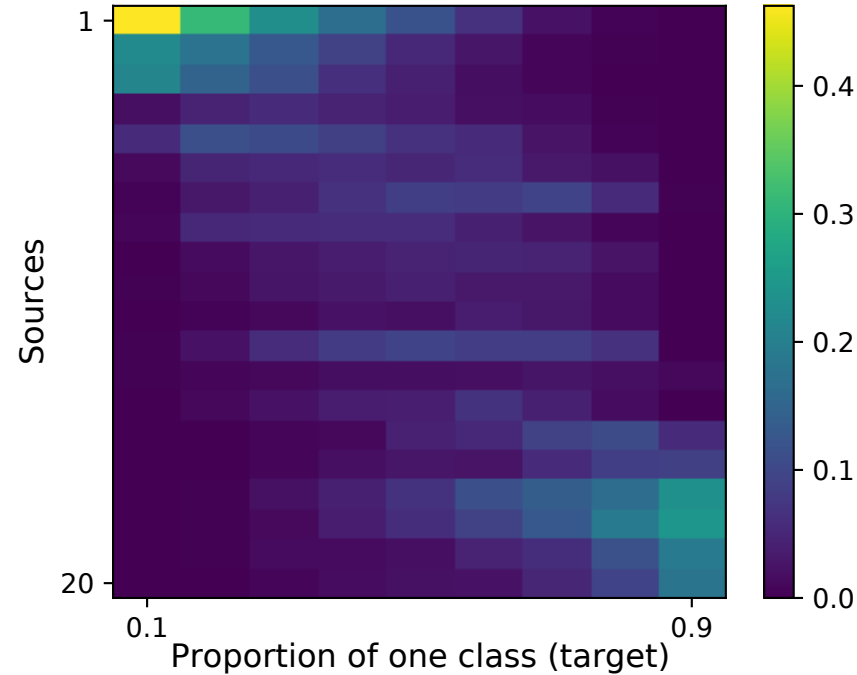

Supplement: supplementary_material [file attachment]

3 sources

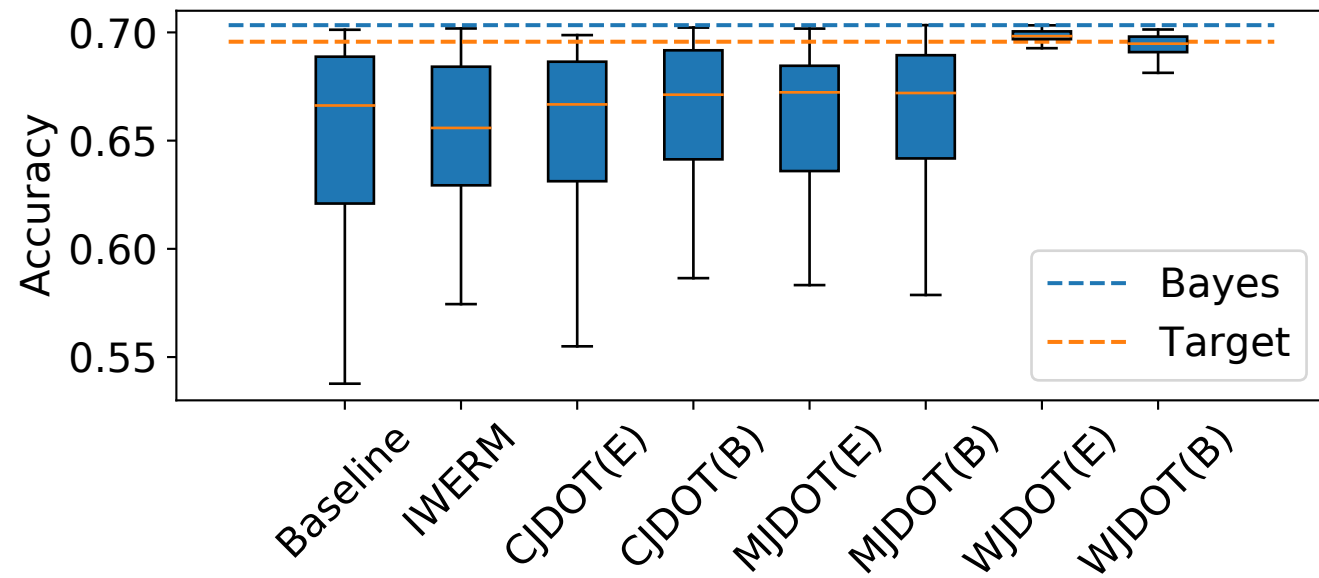

30 sources

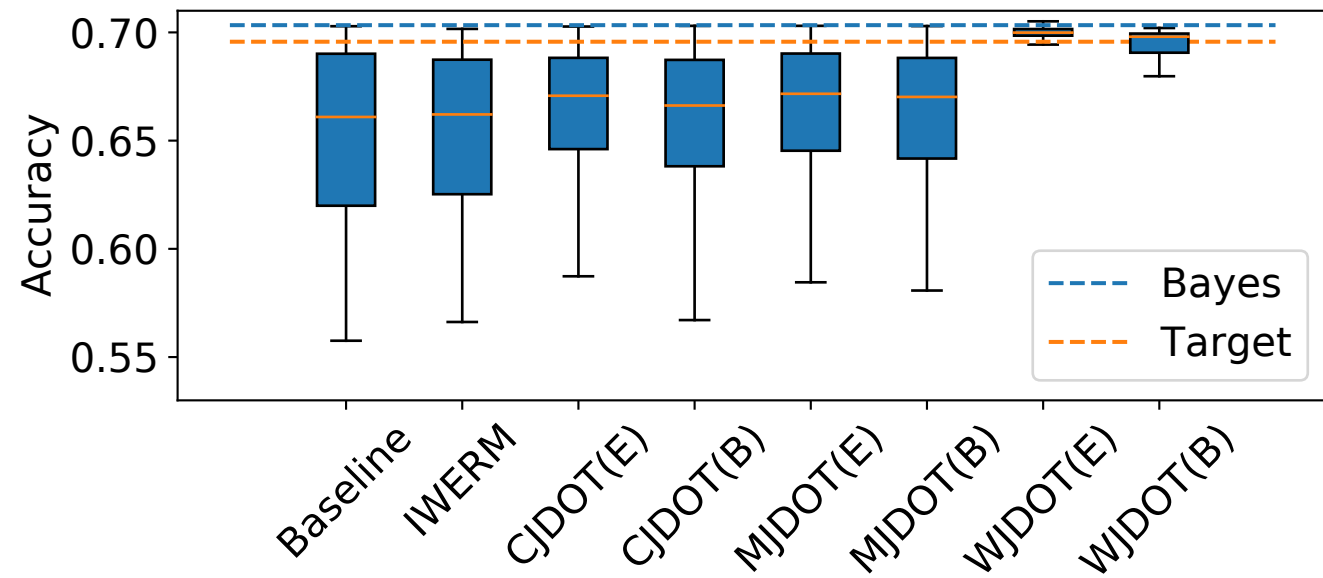

Supplement: supplementary_material [file attachment]

Data

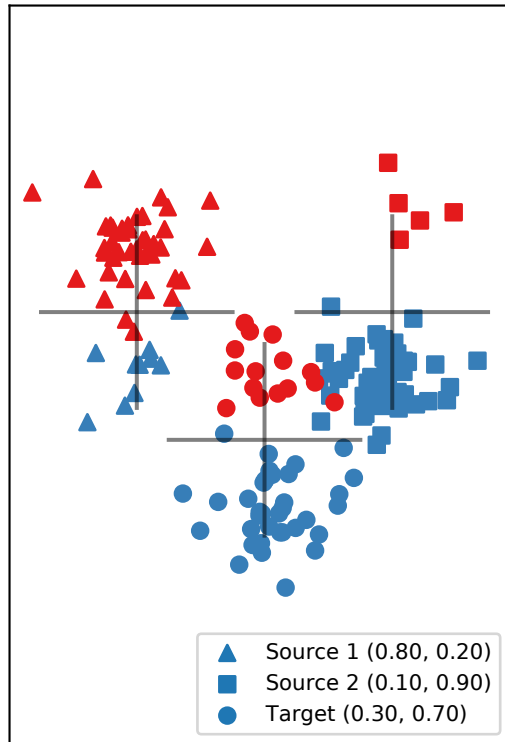

Reweighted Sources

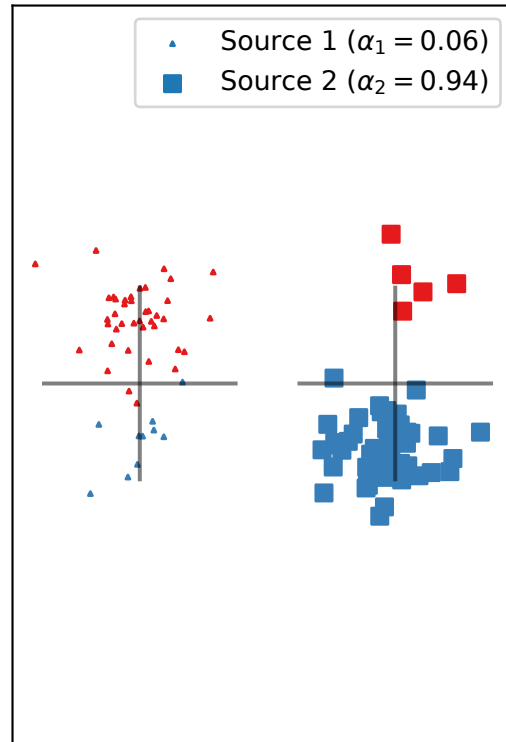

Estimated Target labels and Classifier

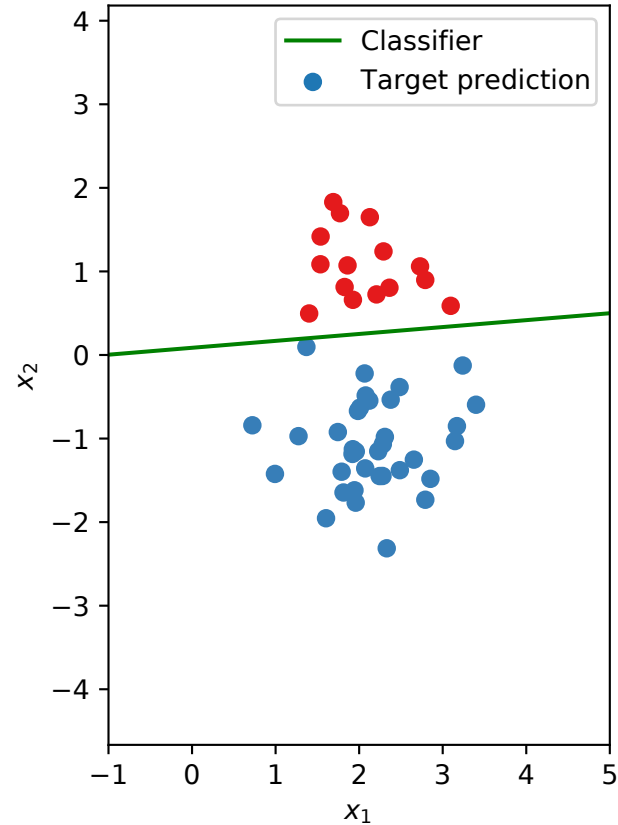

Accuracy

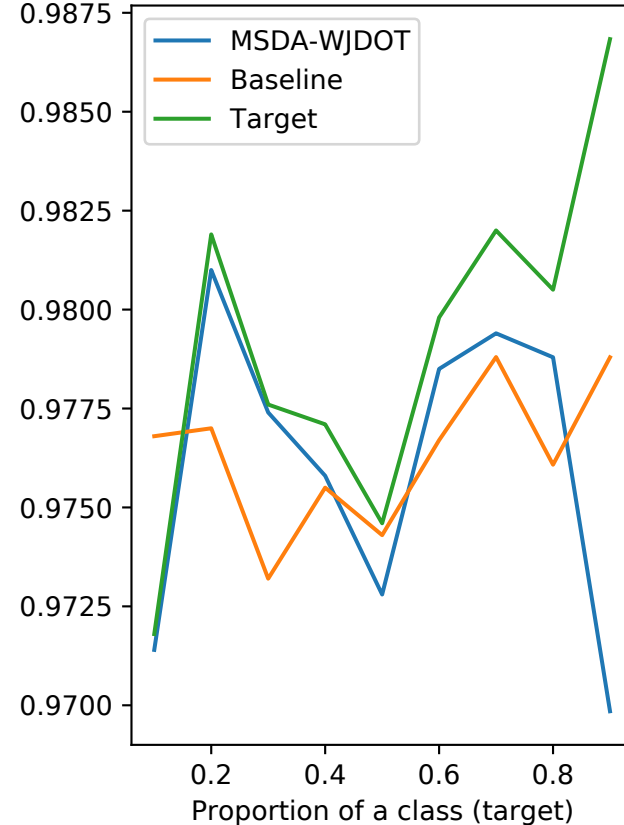

Supplement: supplementary_material [file attachment]

Loss function

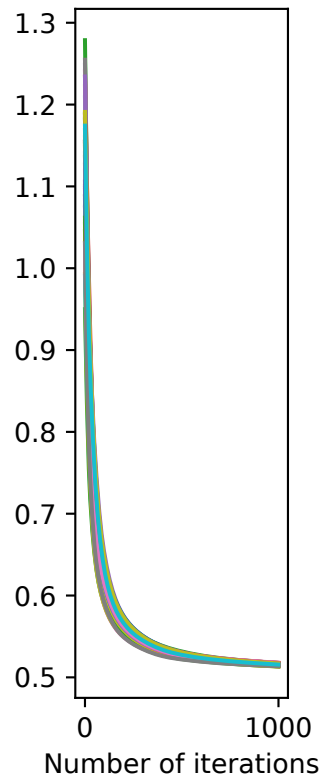 $\alpha$ 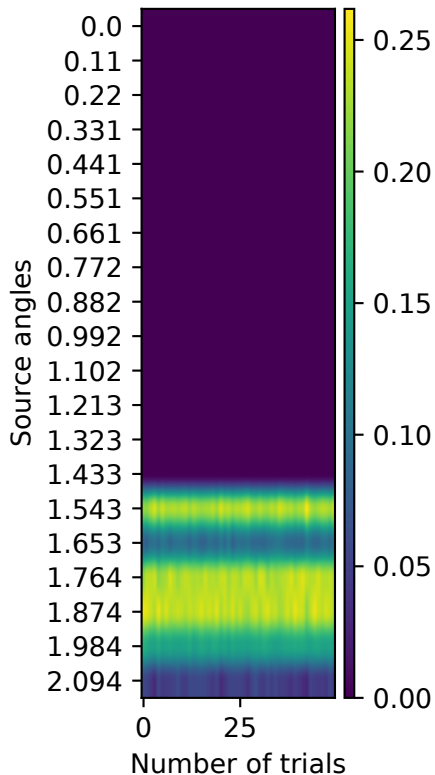

Loss function

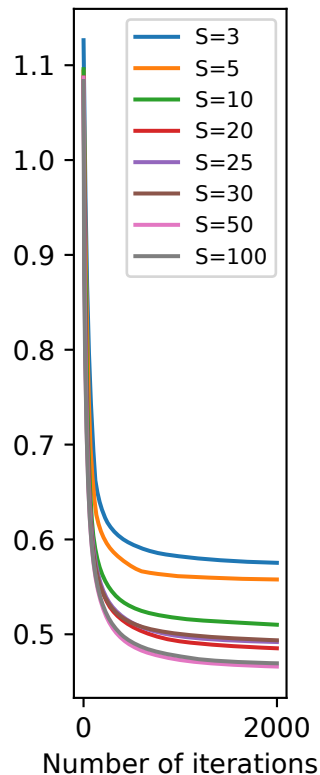 $\alpha$  sparsity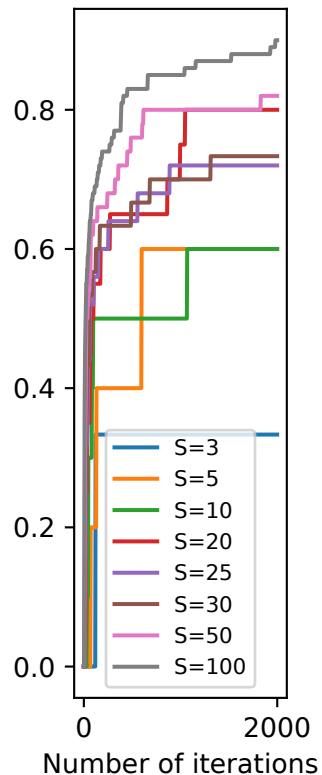

Supplement: supplementary_material [file attachment]

Data

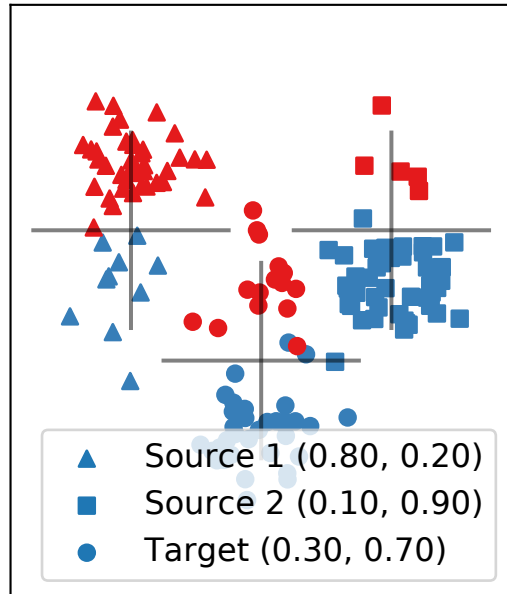

Reweighted Sources

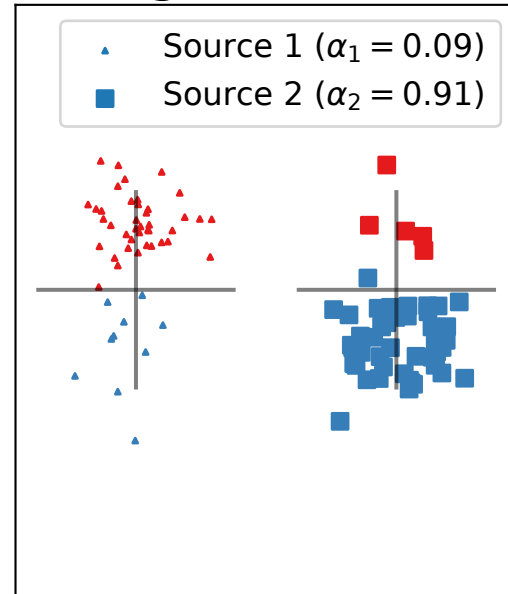

Classification

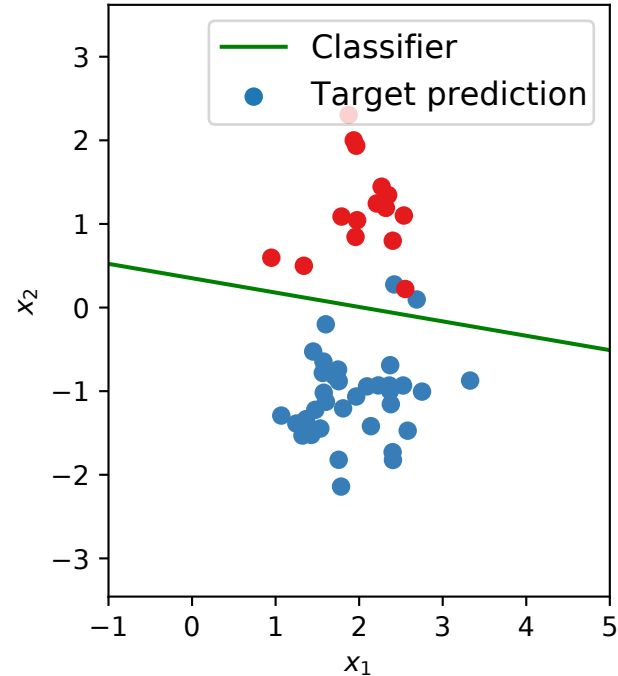

Accuracy

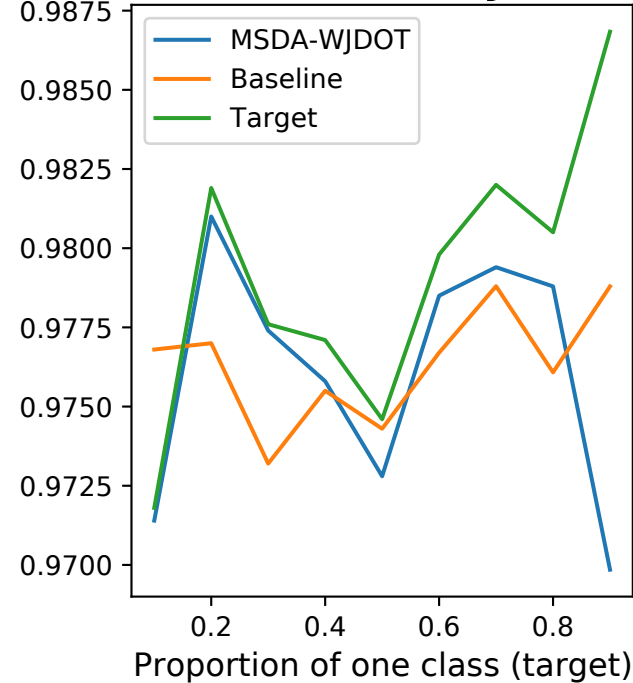

Supplement: supplementary_material [file attachment]

MSDA-WJDOT(E)

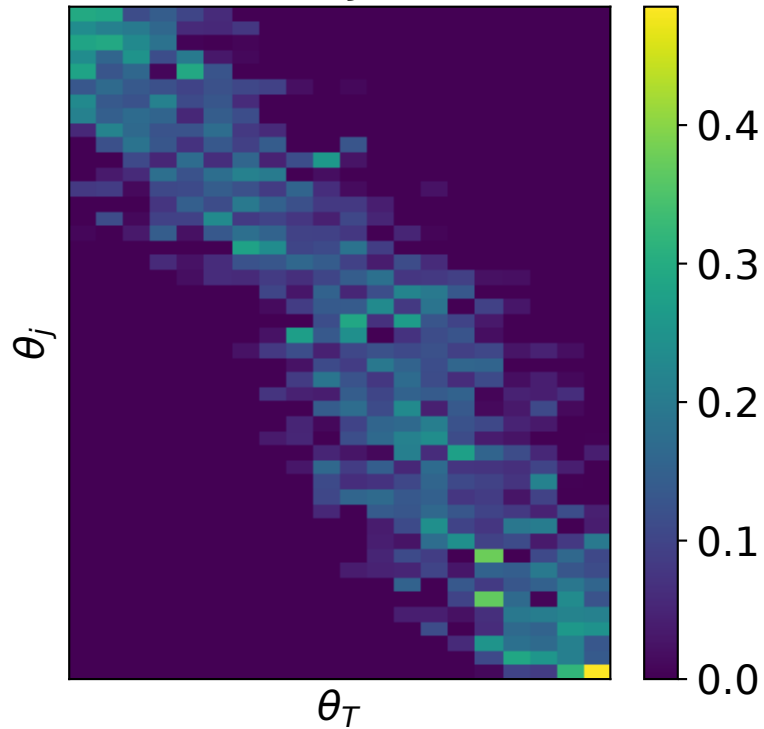

MSDA-WJDOT(B)

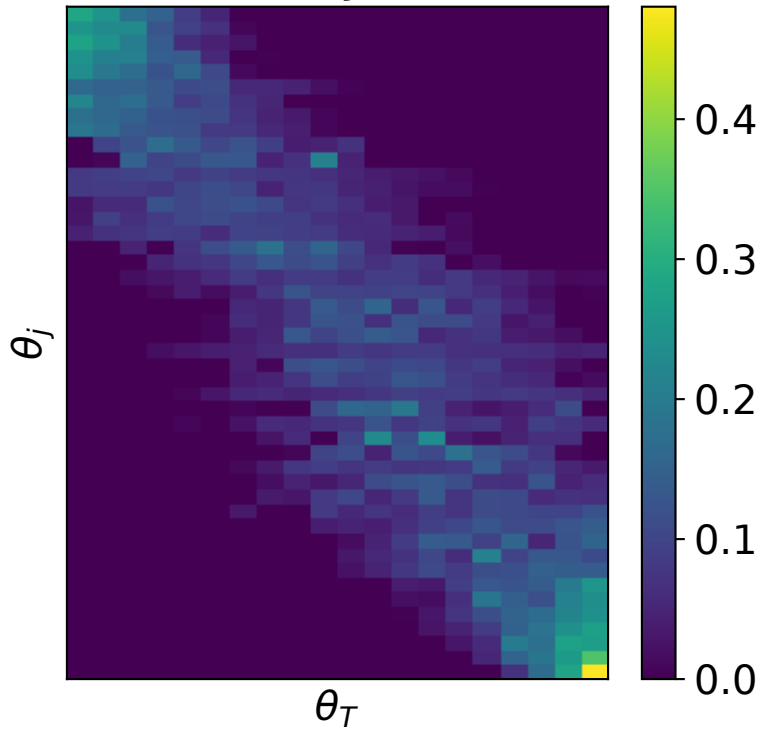

Supplement: supplementary_material [file attachment]

Data

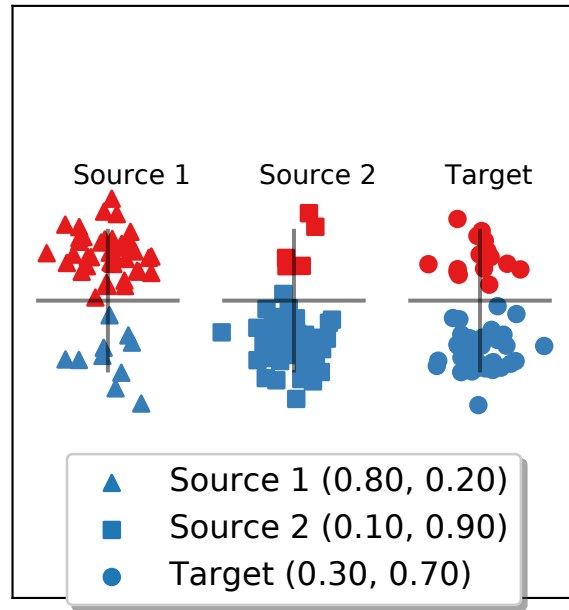

Reweighted Sources

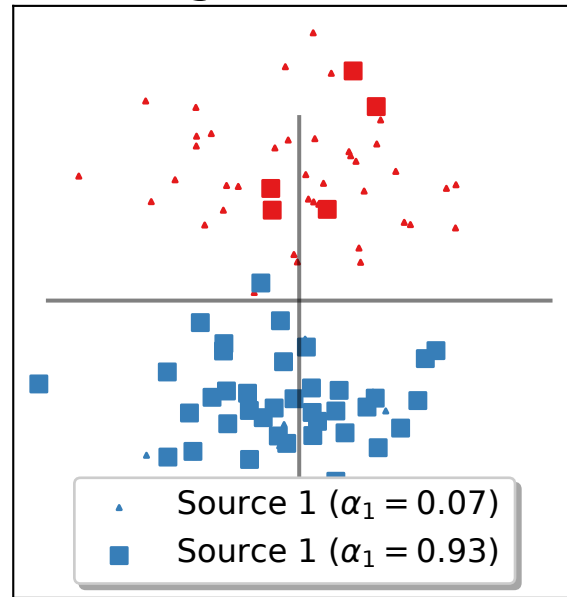

Classification

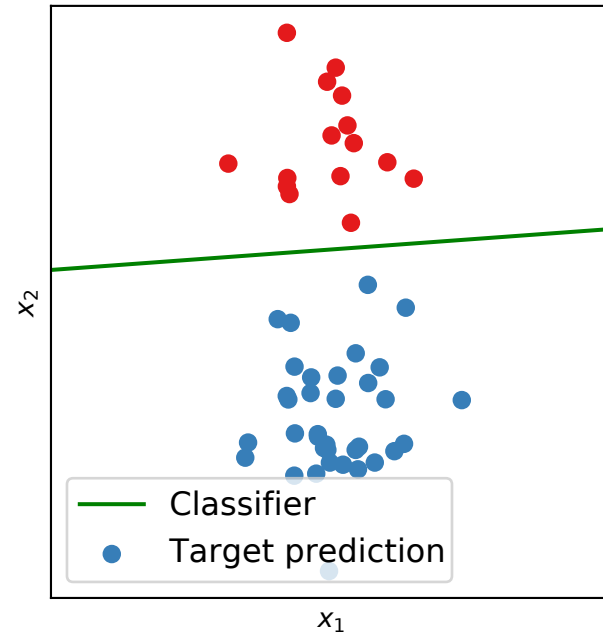 $\alpha$  coefficients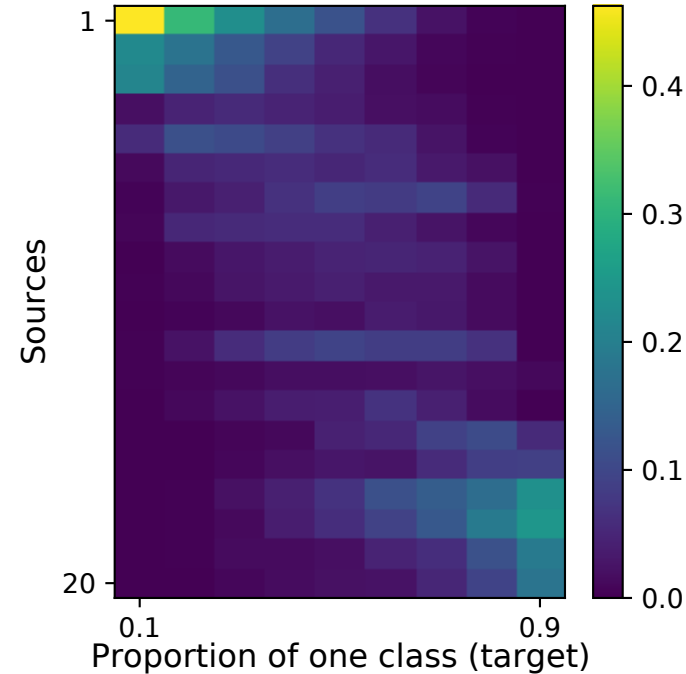

Supplement: supplementary_material [file attachment]

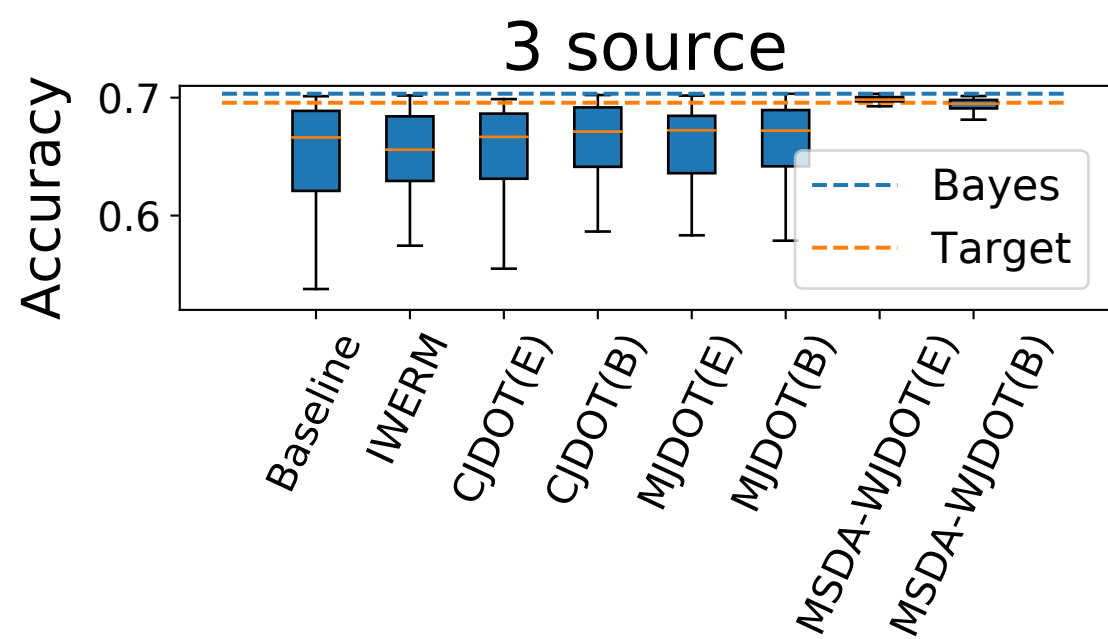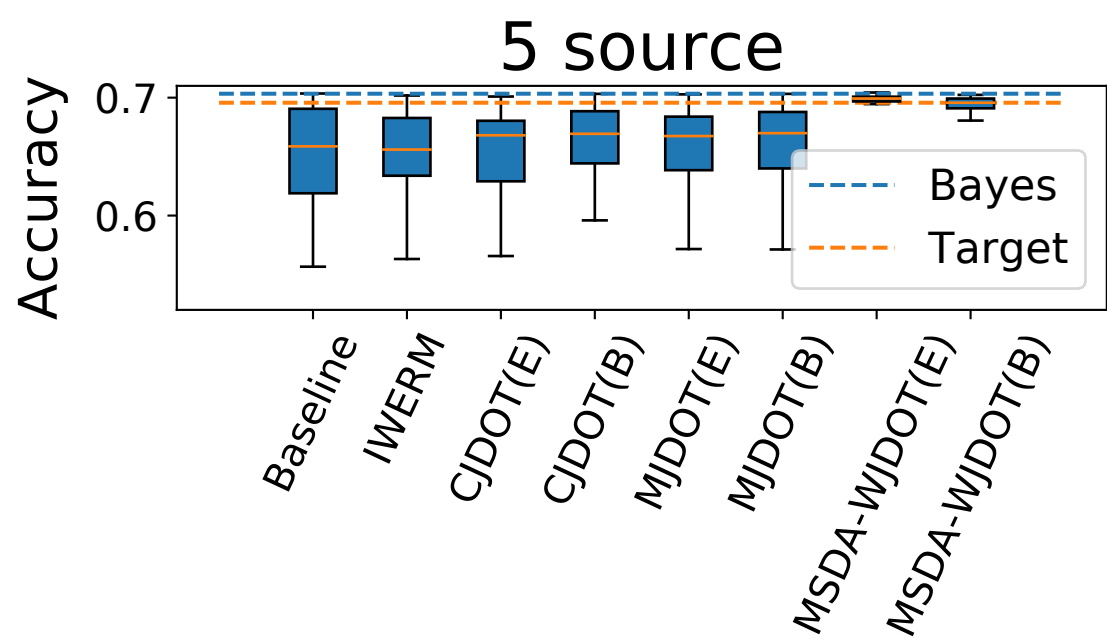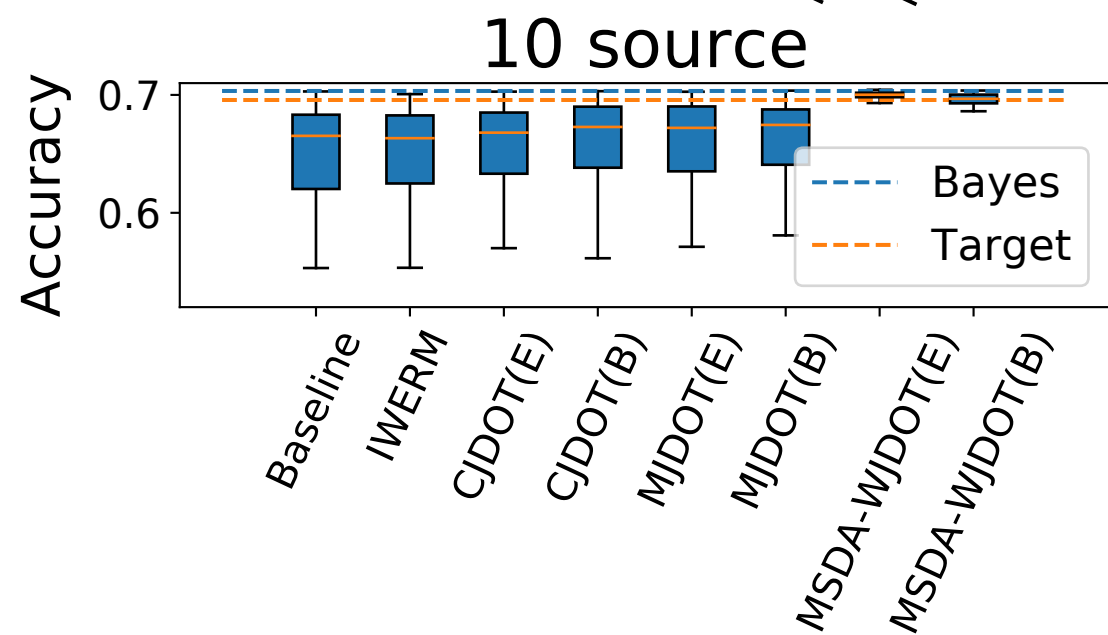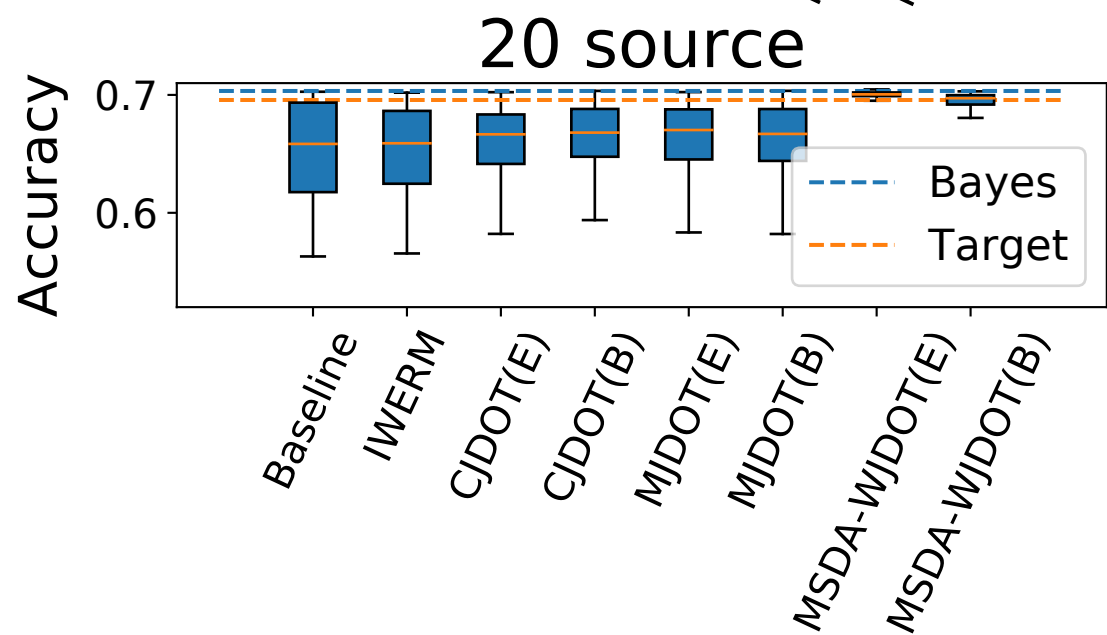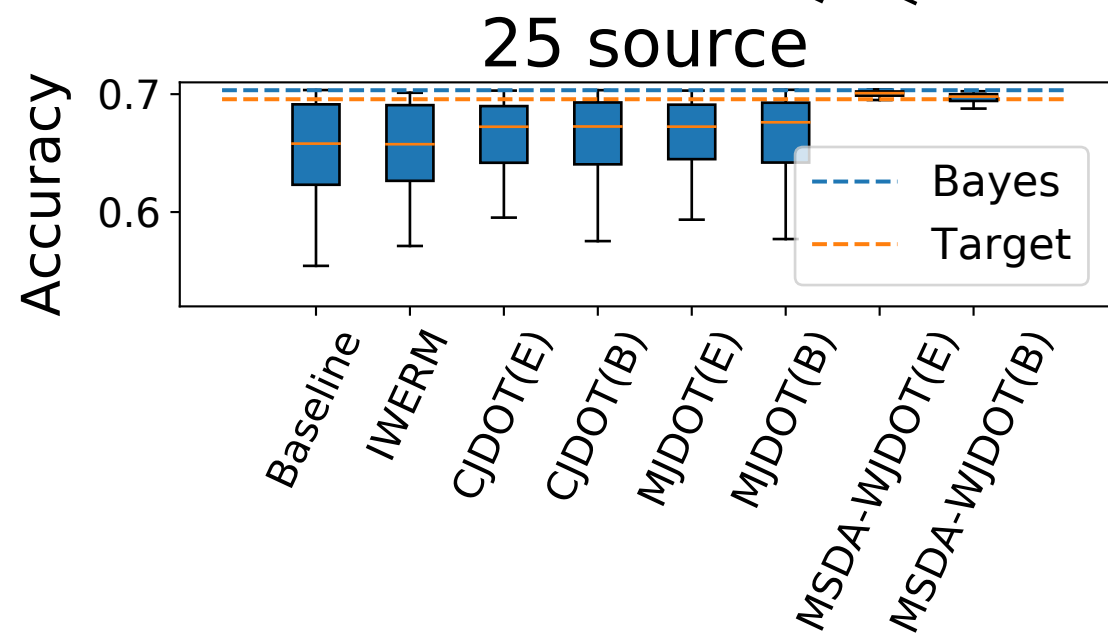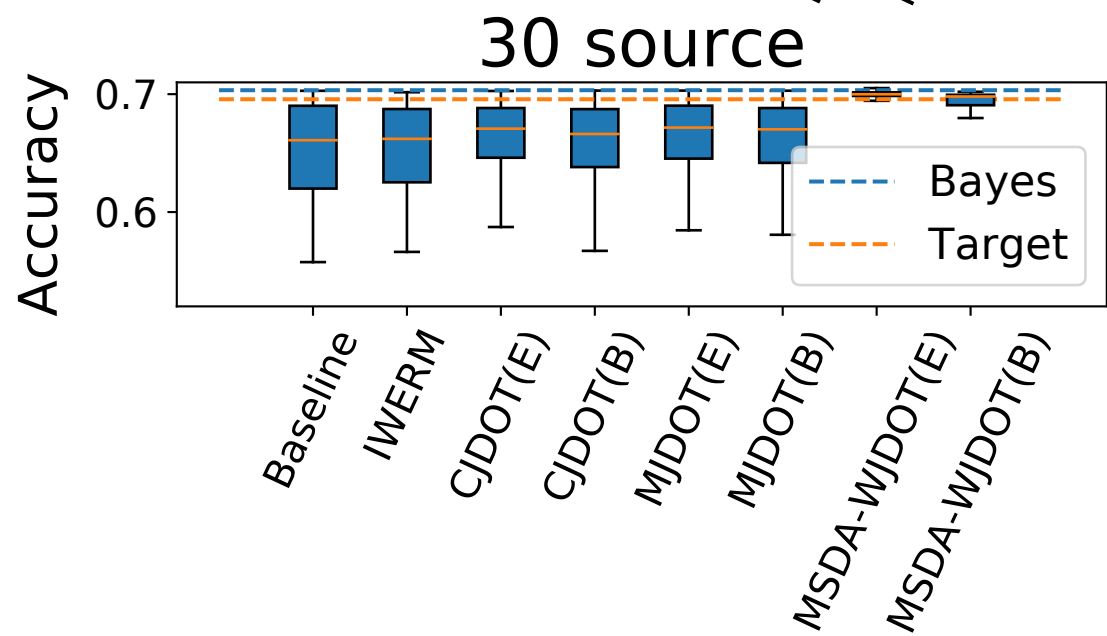

Supplement: supplementary_material [file attachment]

60 samples

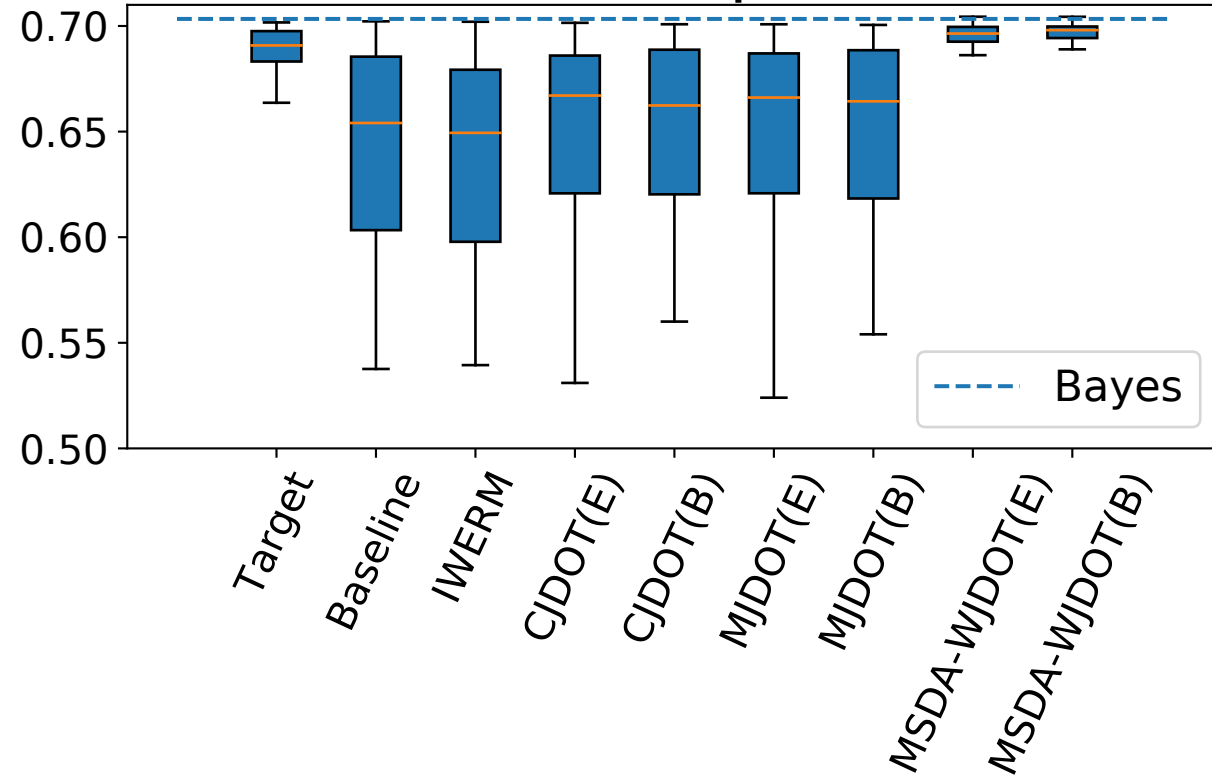

180 samples

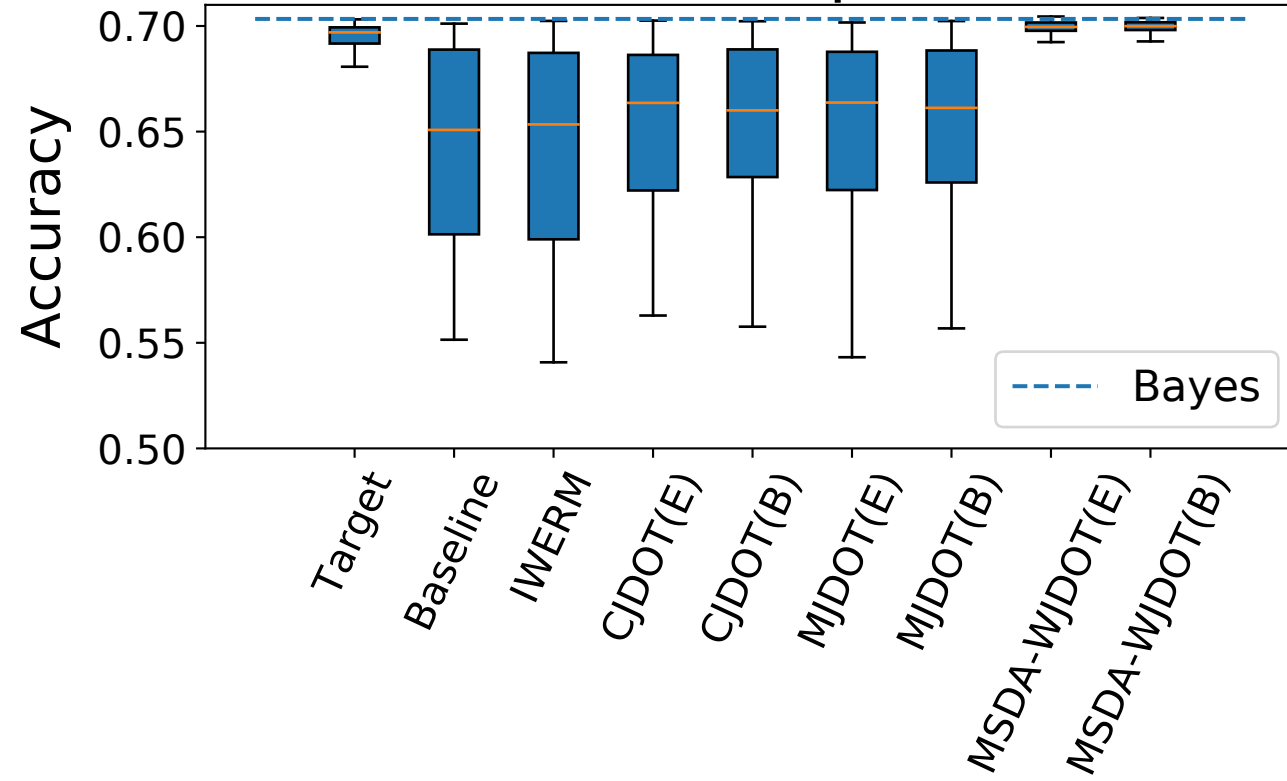

300 samples

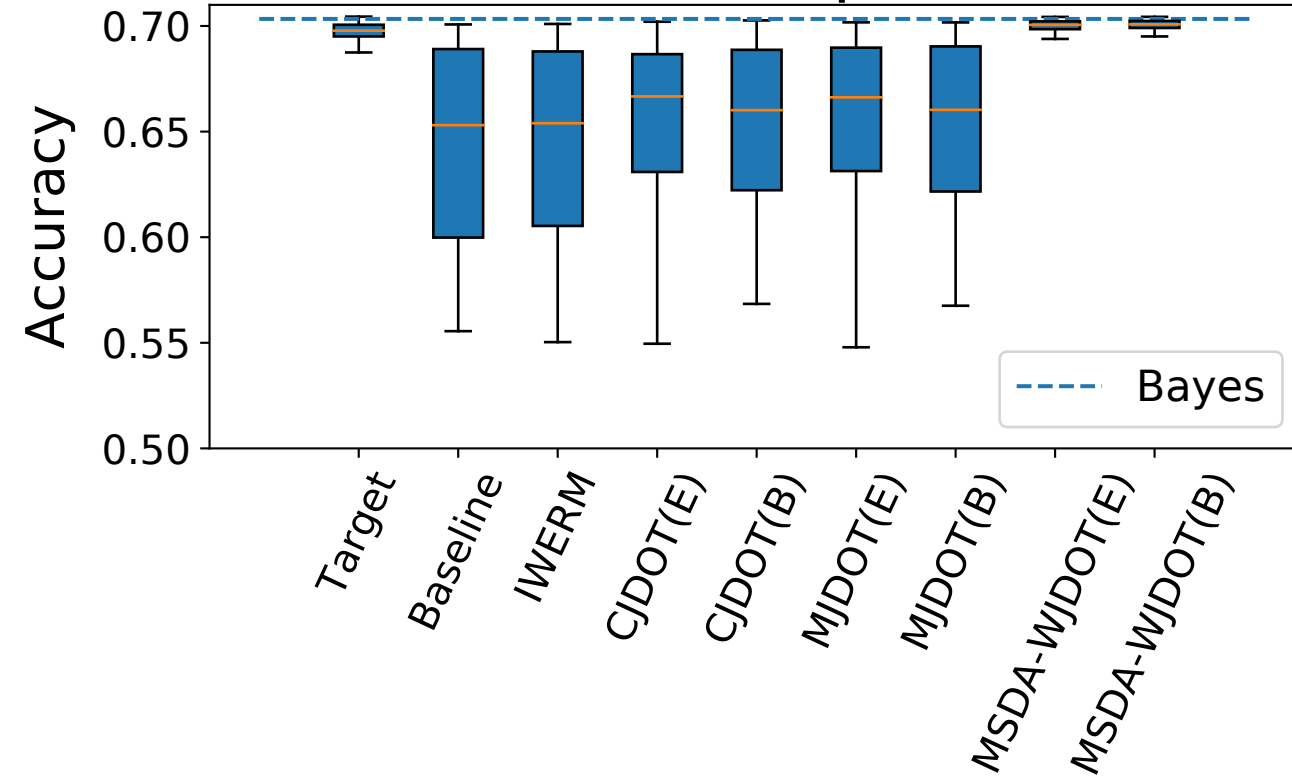

Supplement: supplementary_material [file attachment]

Loss functions

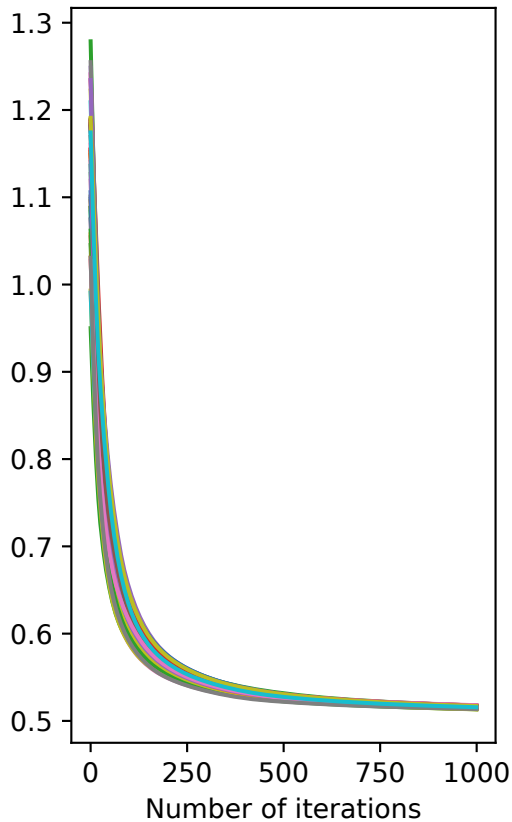

$\alpha$  coefficients for target angle  $\theta = 1.827$

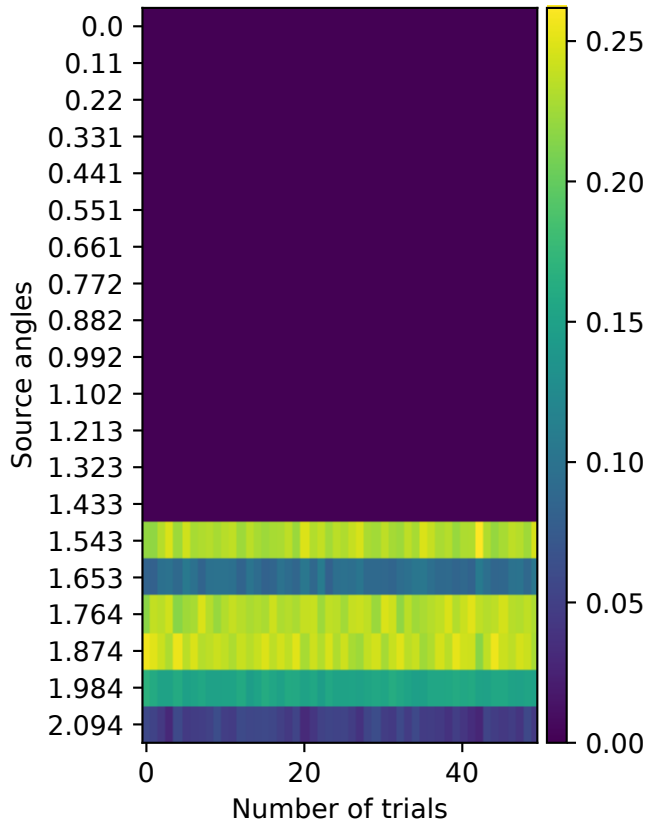

Supplement: supplementary_material [file attachment]

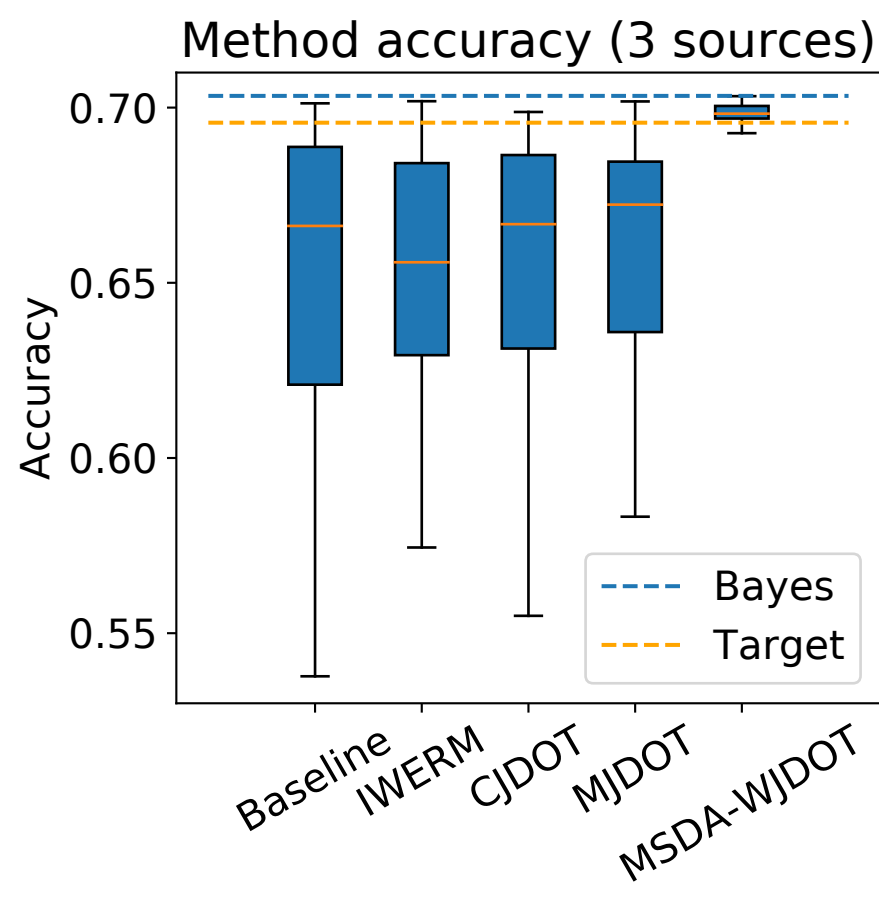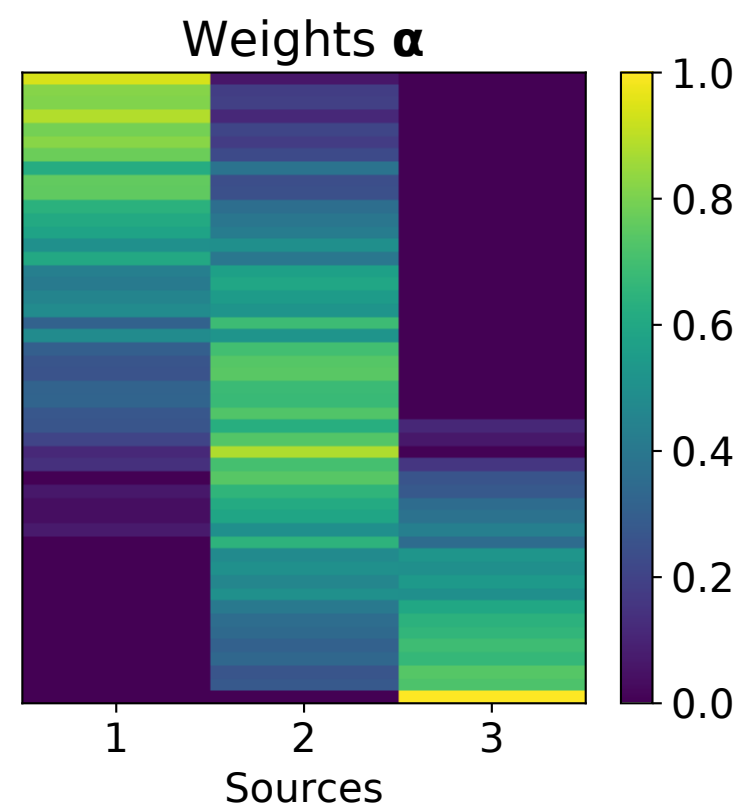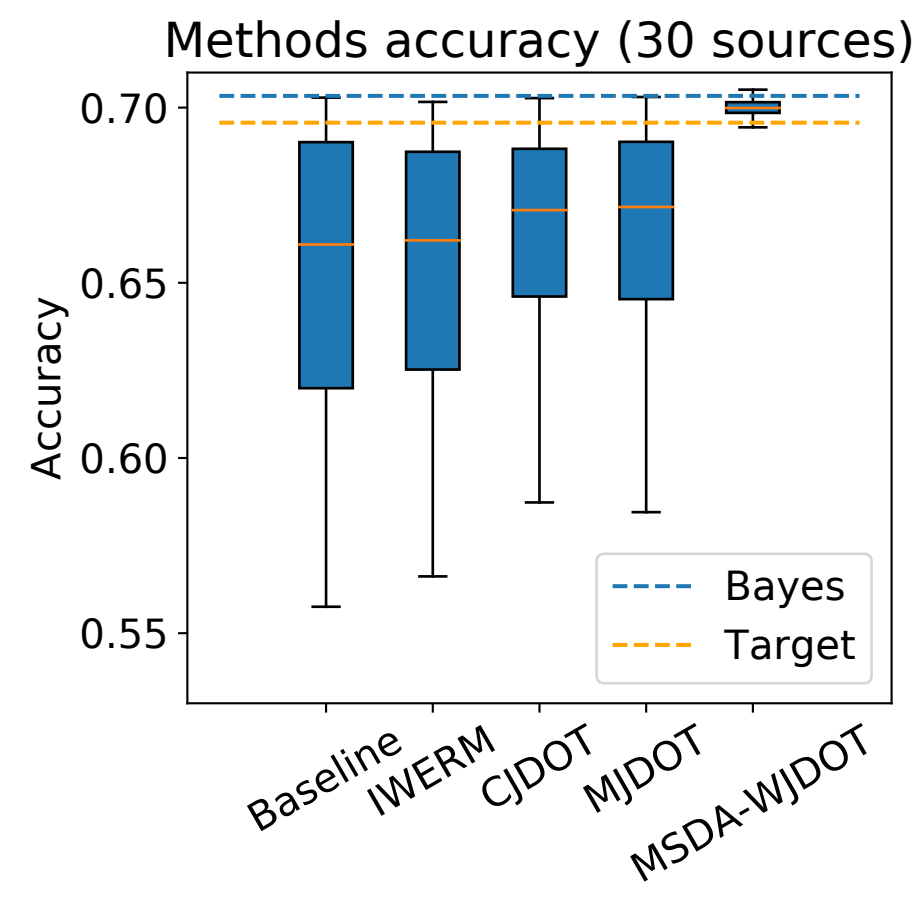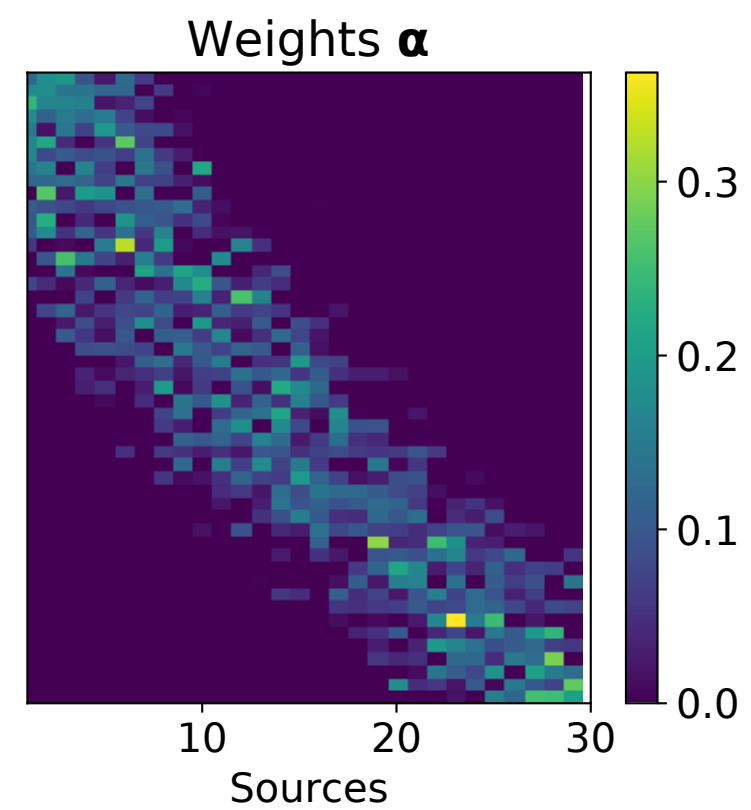

Supplement: supplementary_material [file attachment]

WJDOT(E)

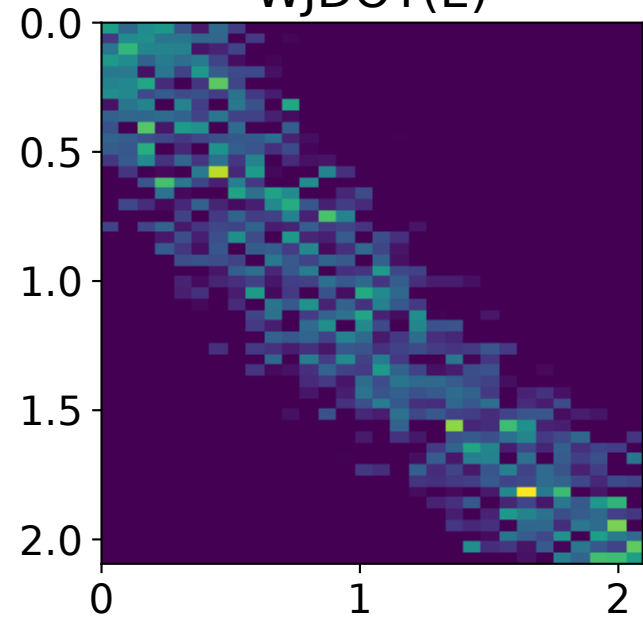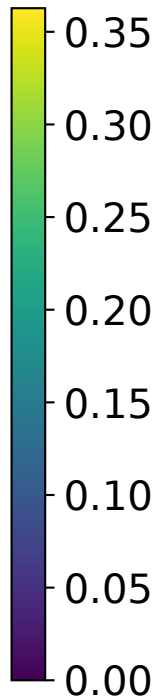

WJDOT(B)

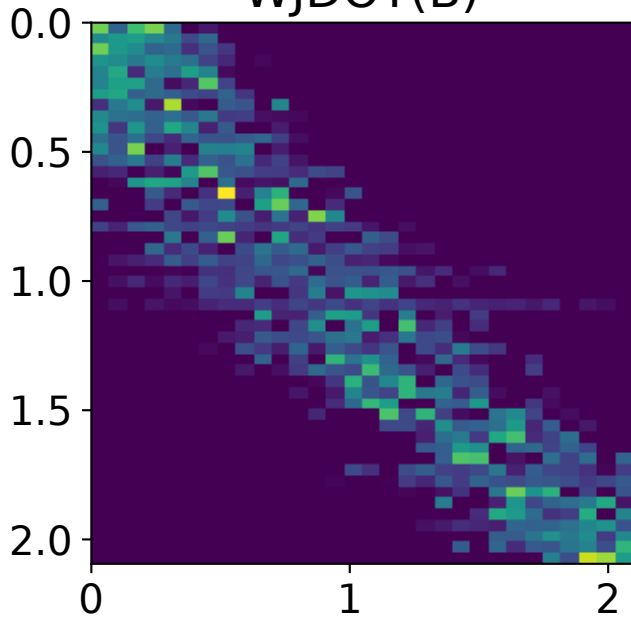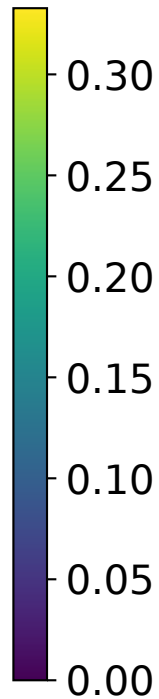

Supplement: supplementary_material [file attachment]

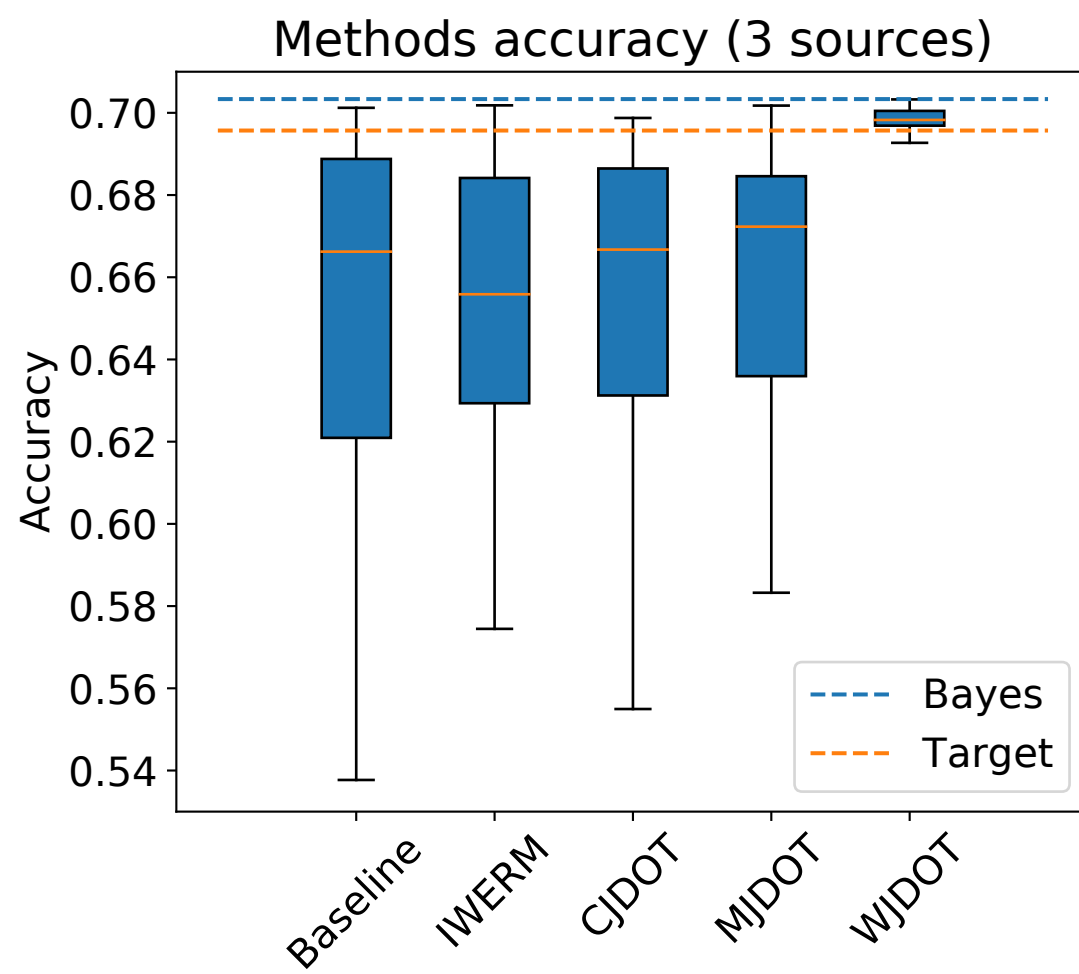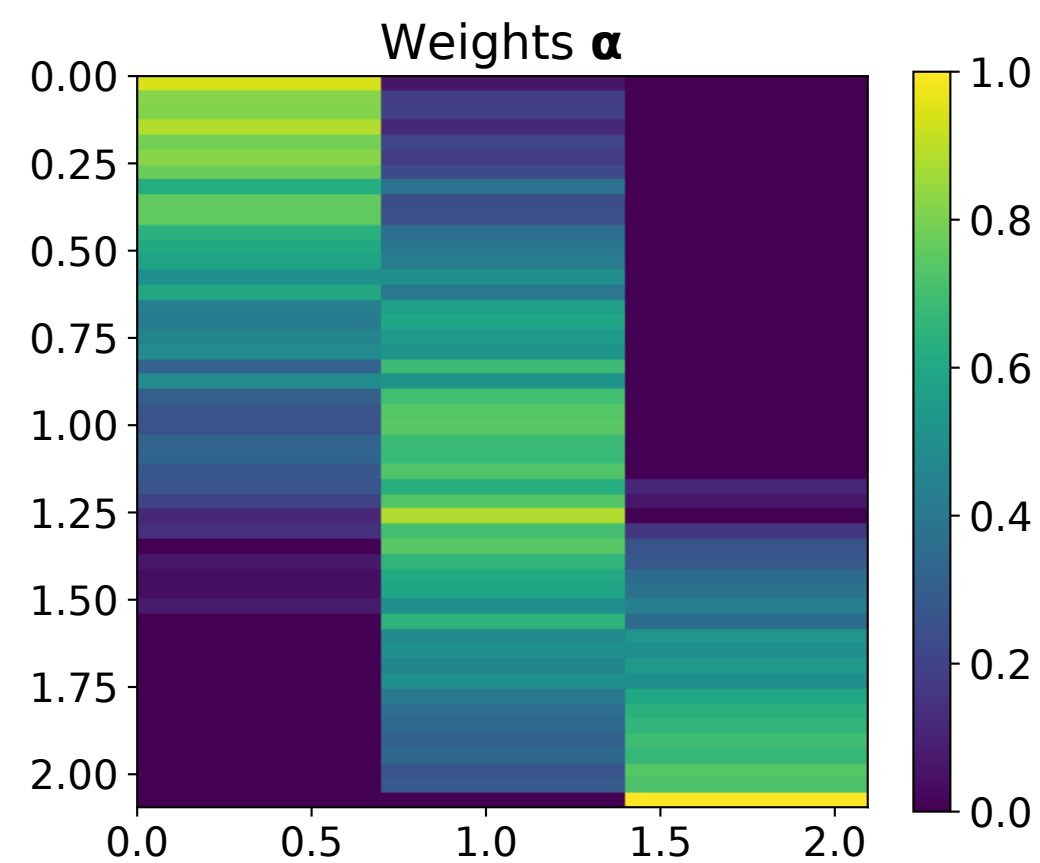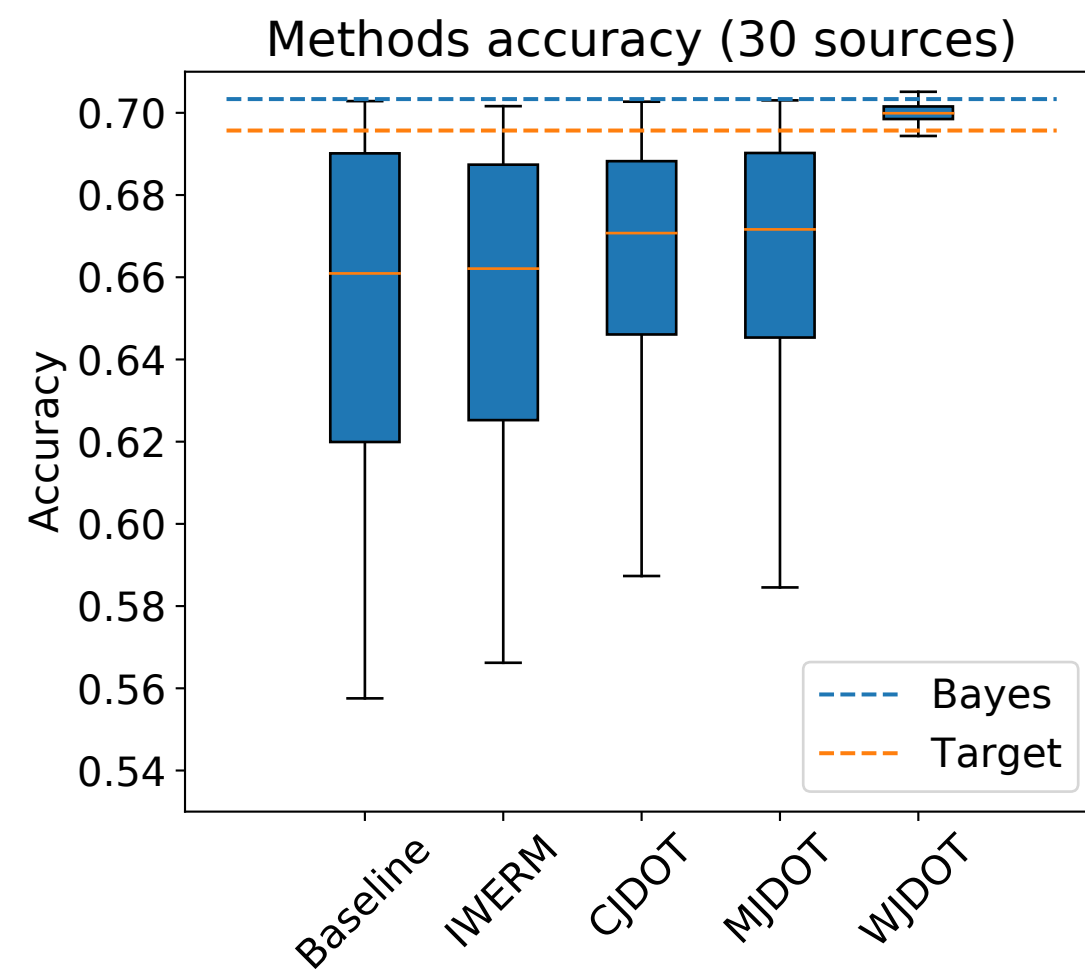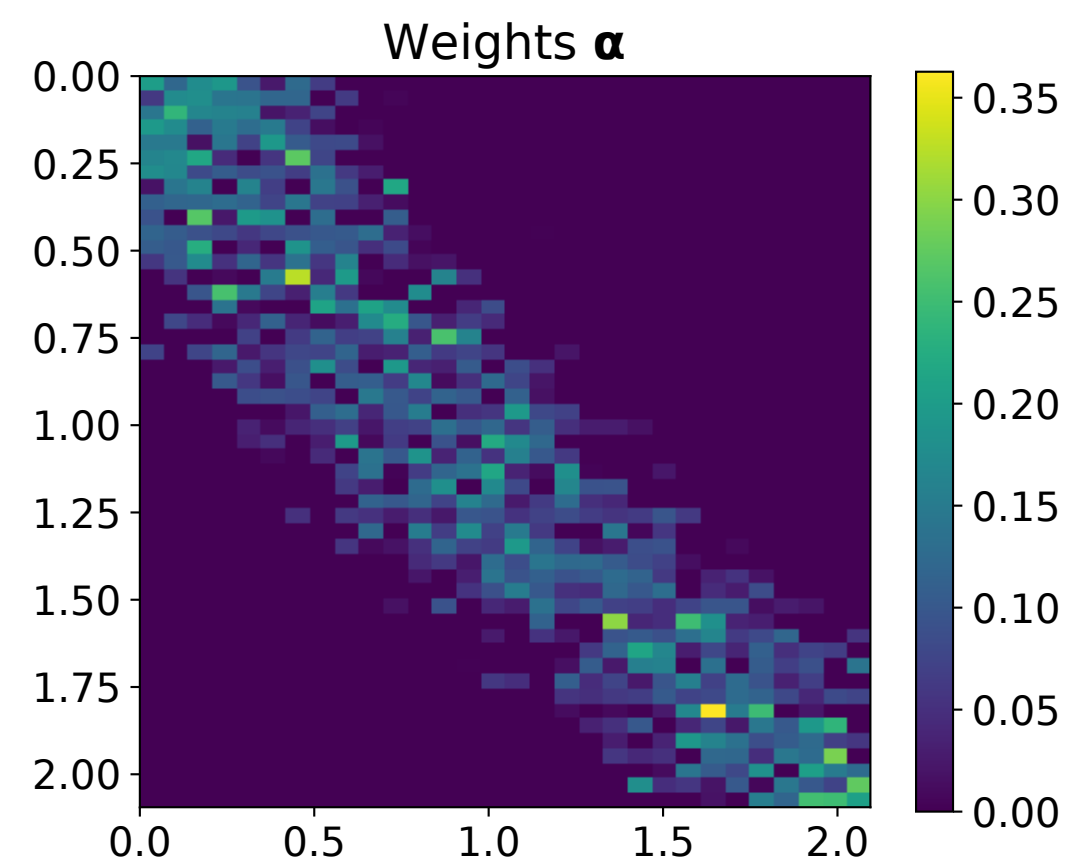

Supplement: supplementary_material [file attachment]

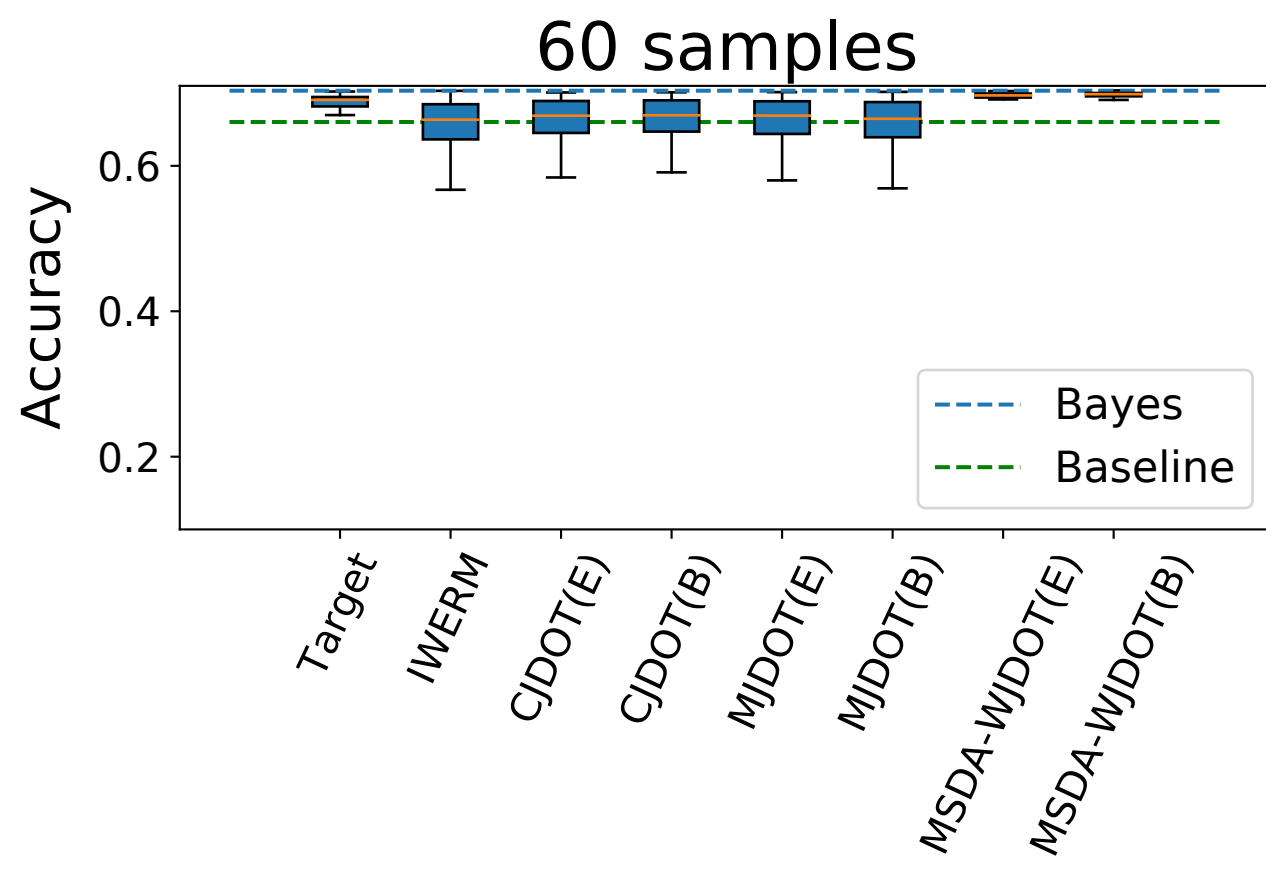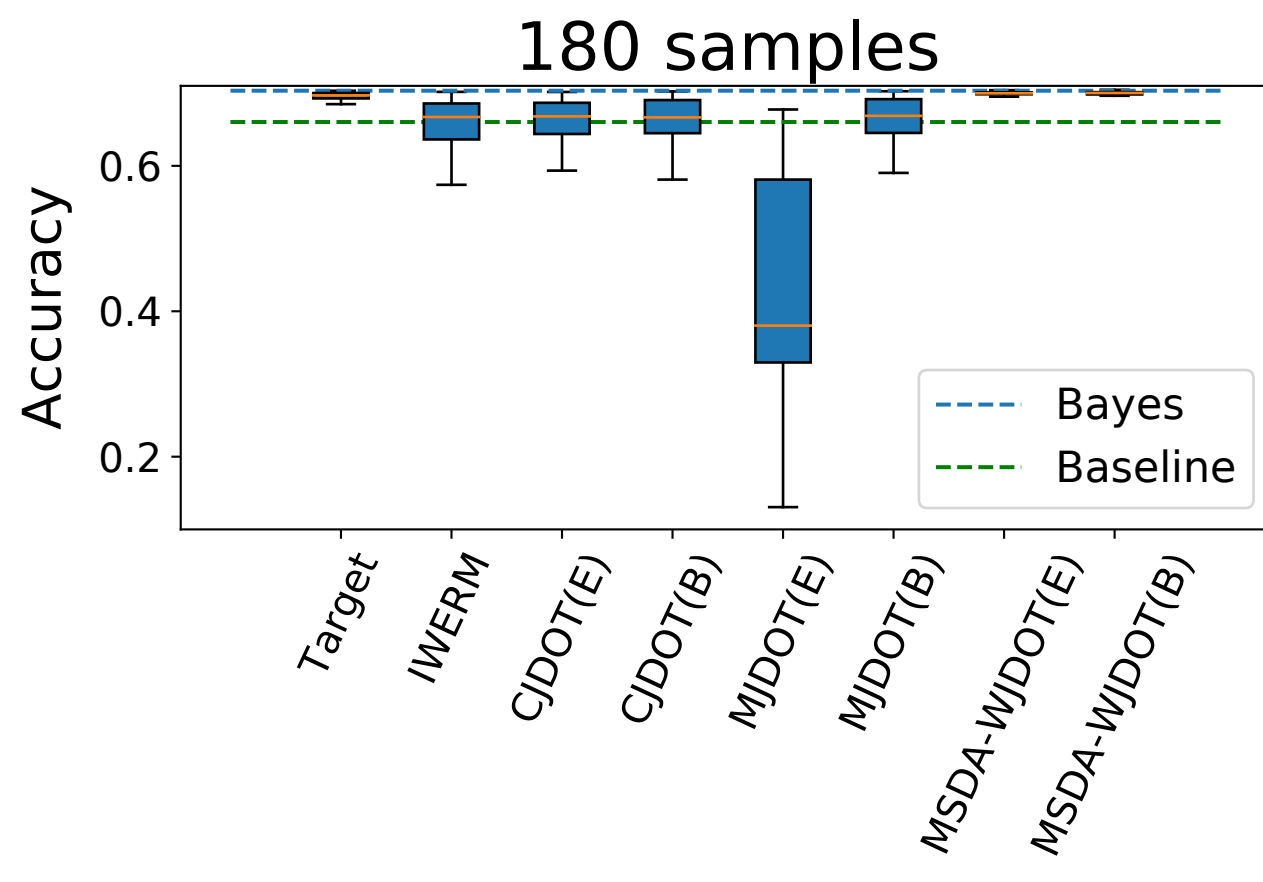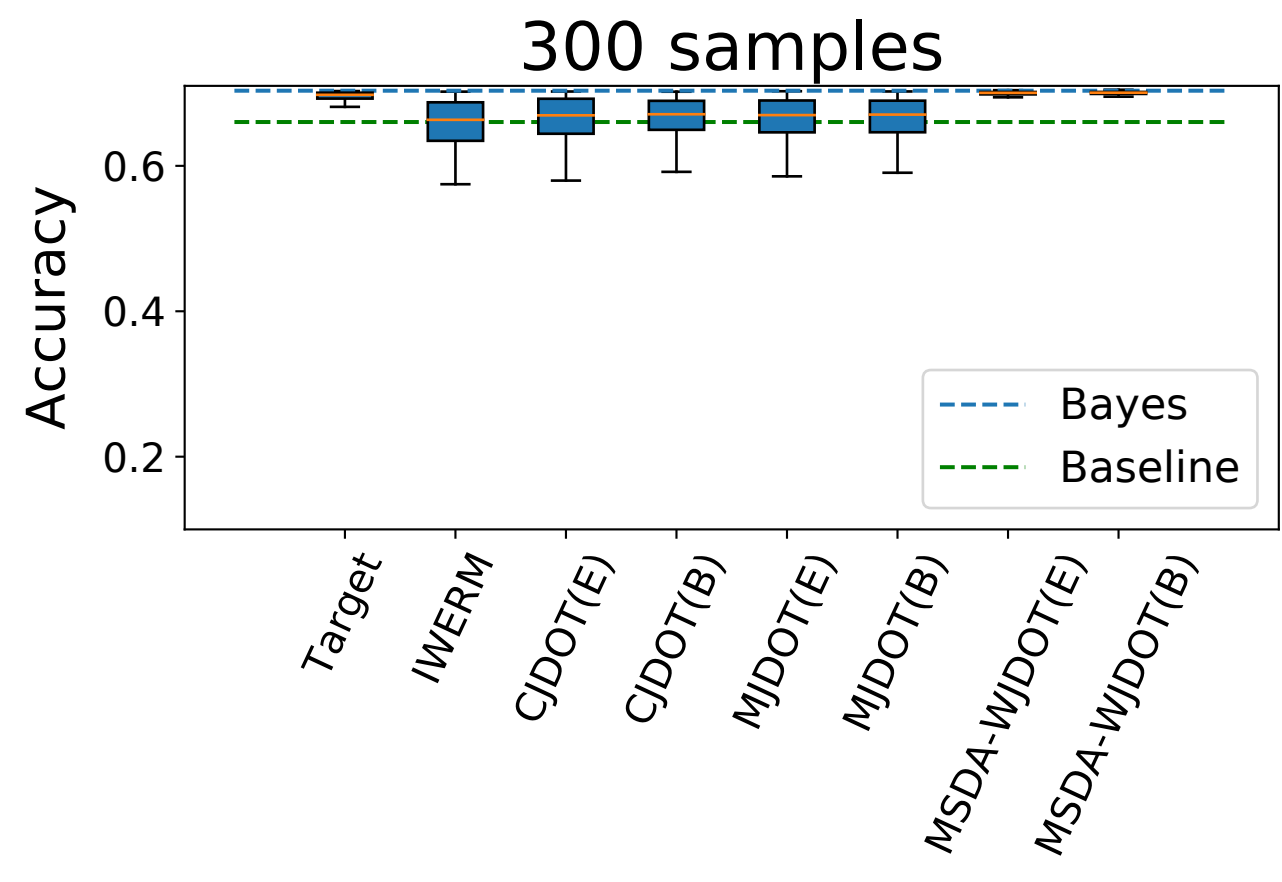

Supplement: supplementary_material [file attachment]

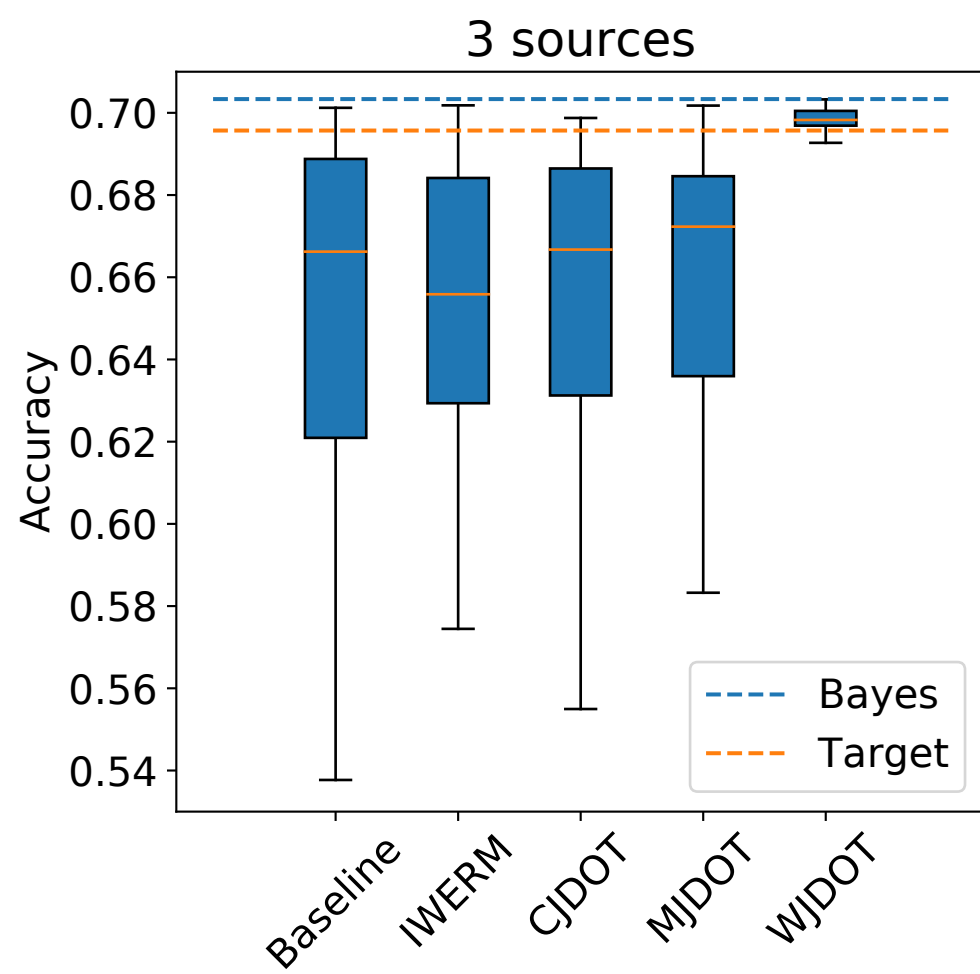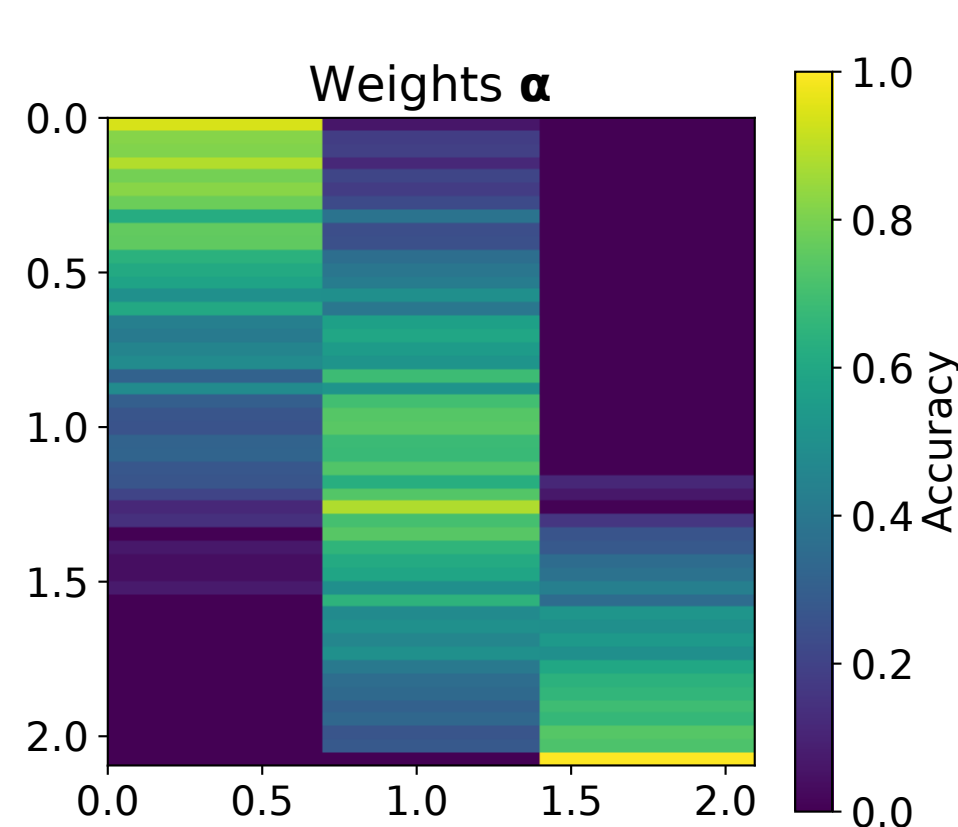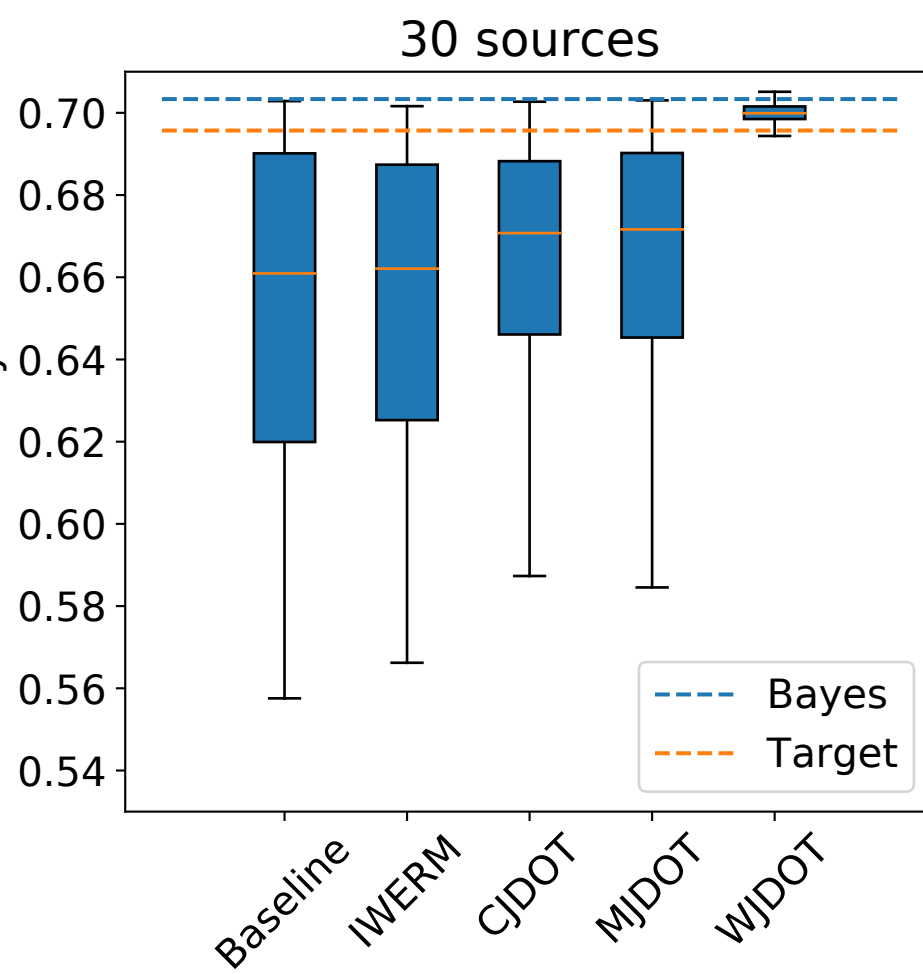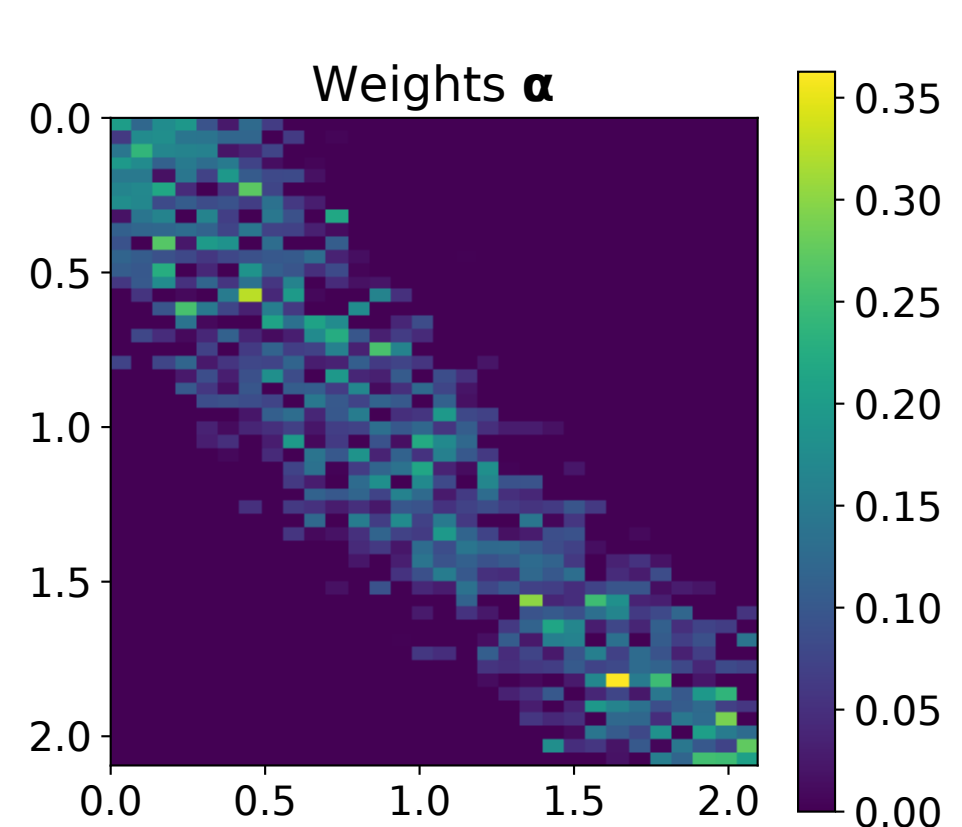

Supplement: supplementary_material [file attachment]

60 samples

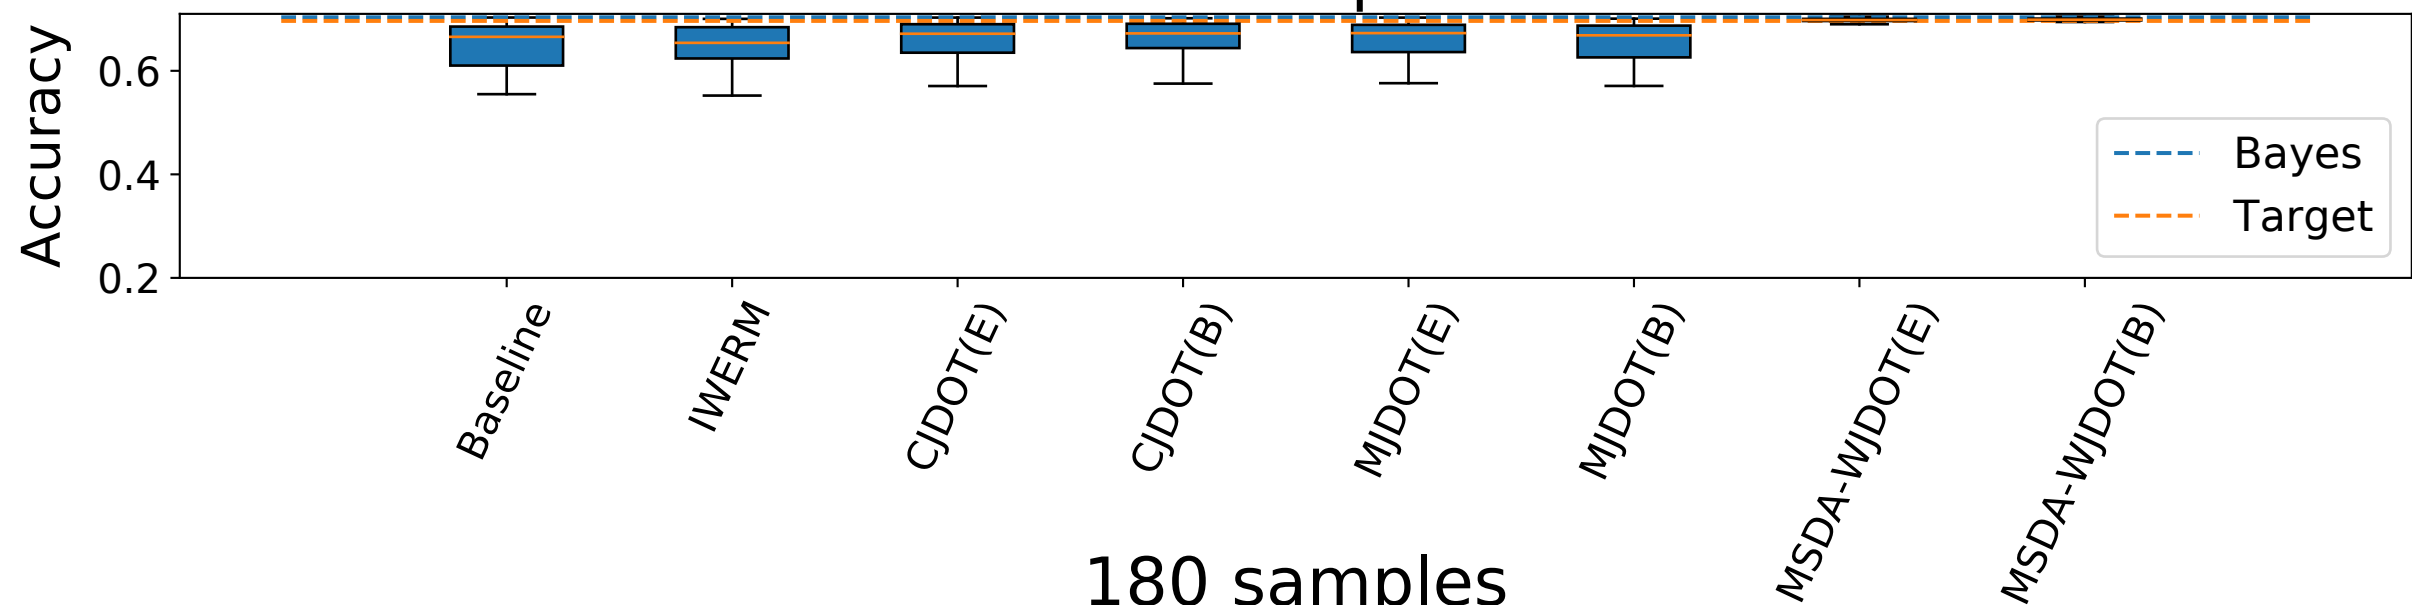

180 samples

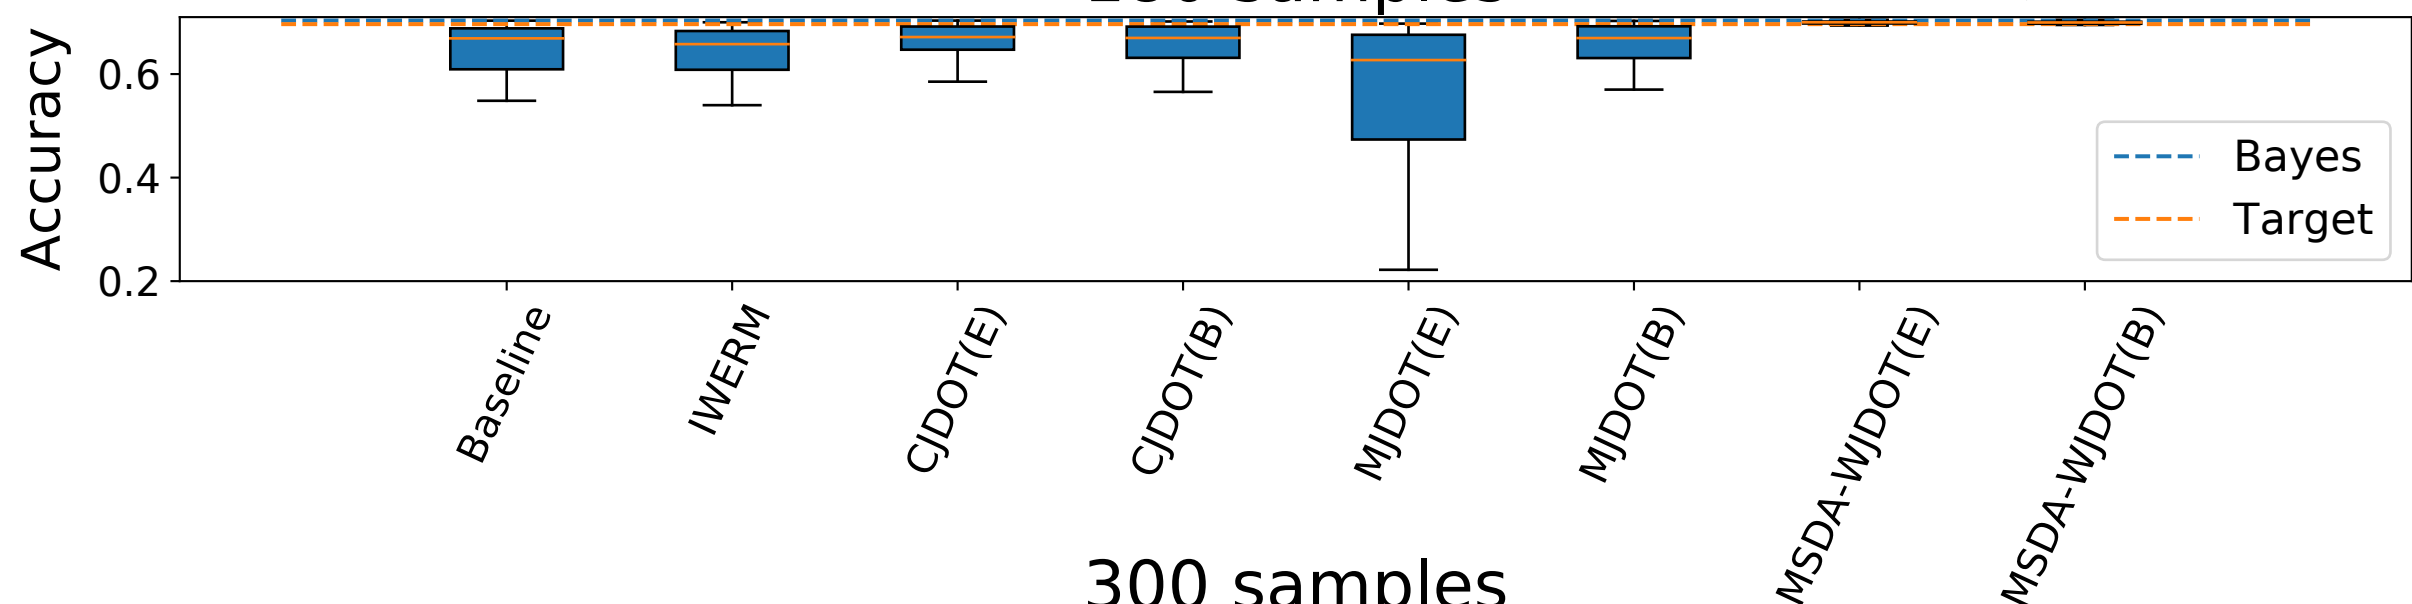

300 samples

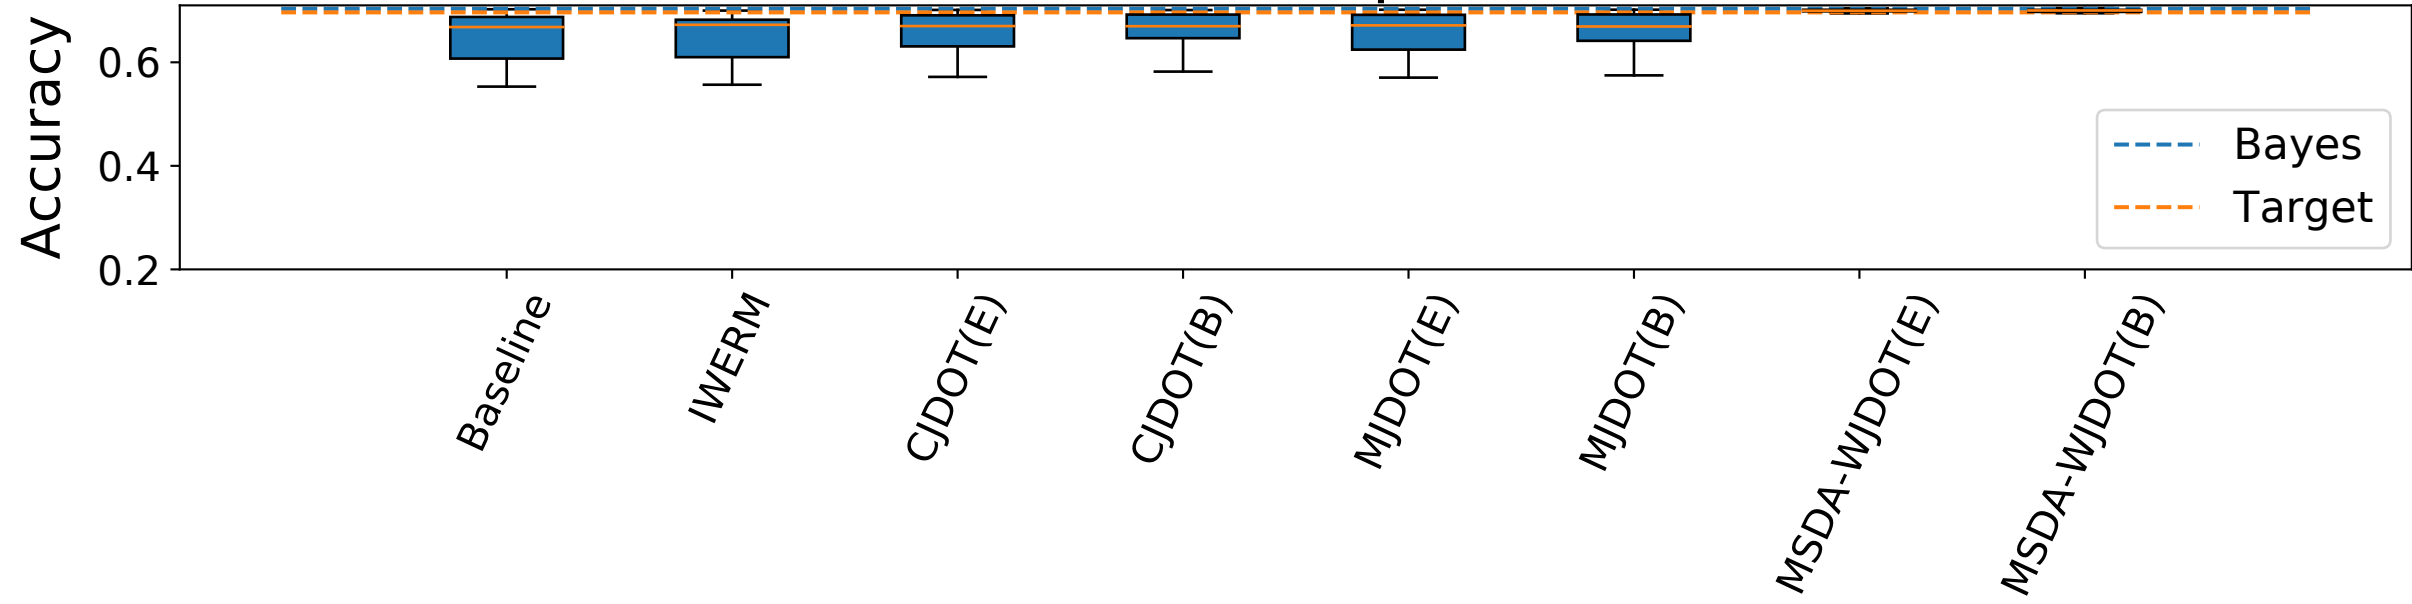

Supplement: supplementary_material [file attachment]

# Loss function

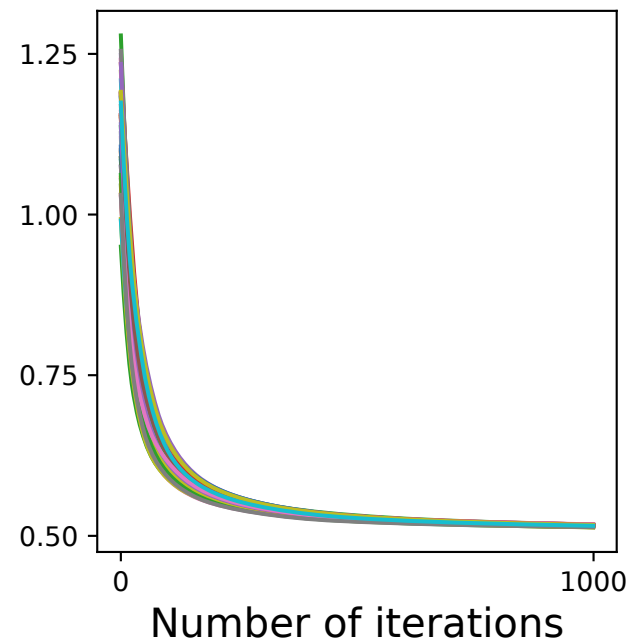

# $\alpha$

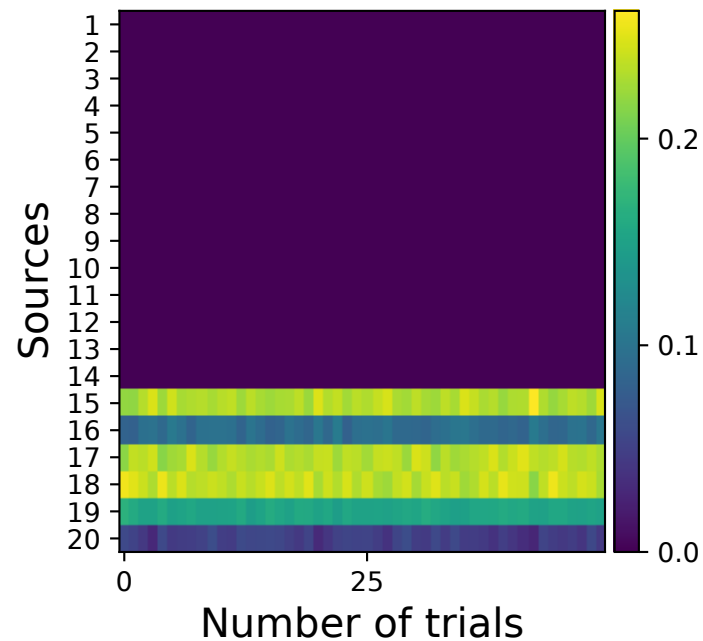

# Loss function

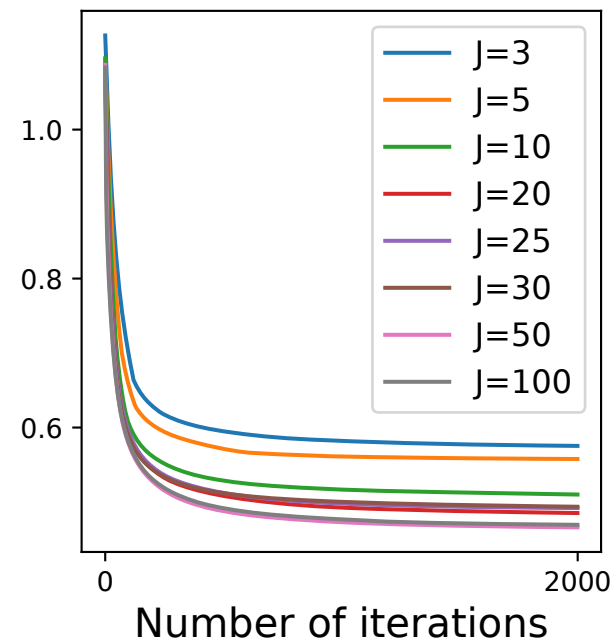

# $\alpha$ sparsity

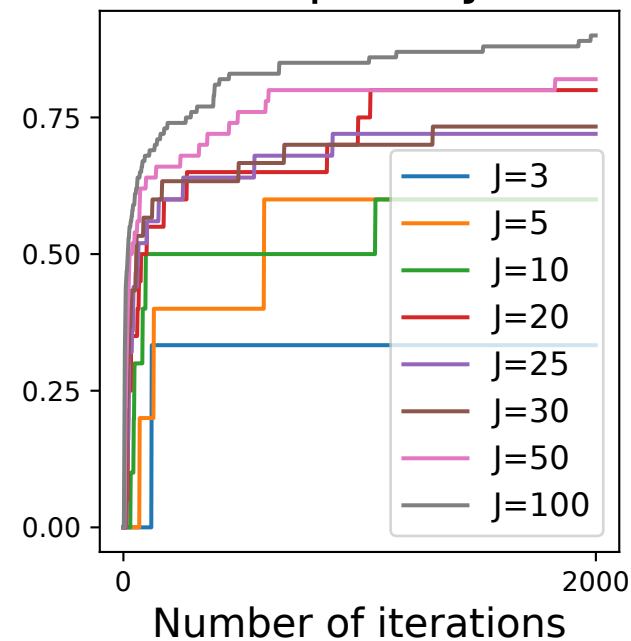

Supplement: supplementary_material [file attachment]

3 sources

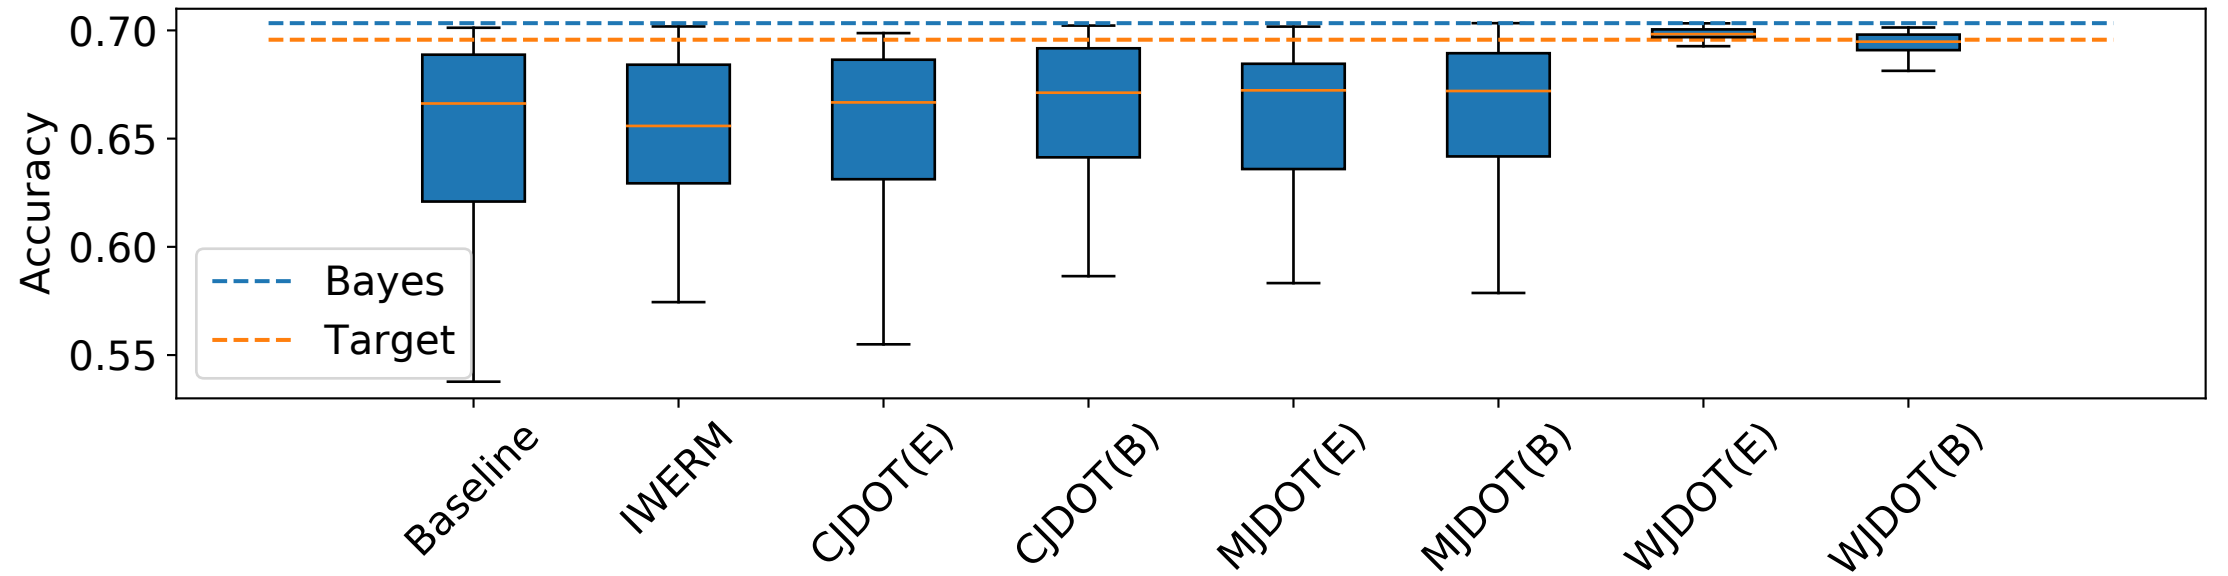

30 sources

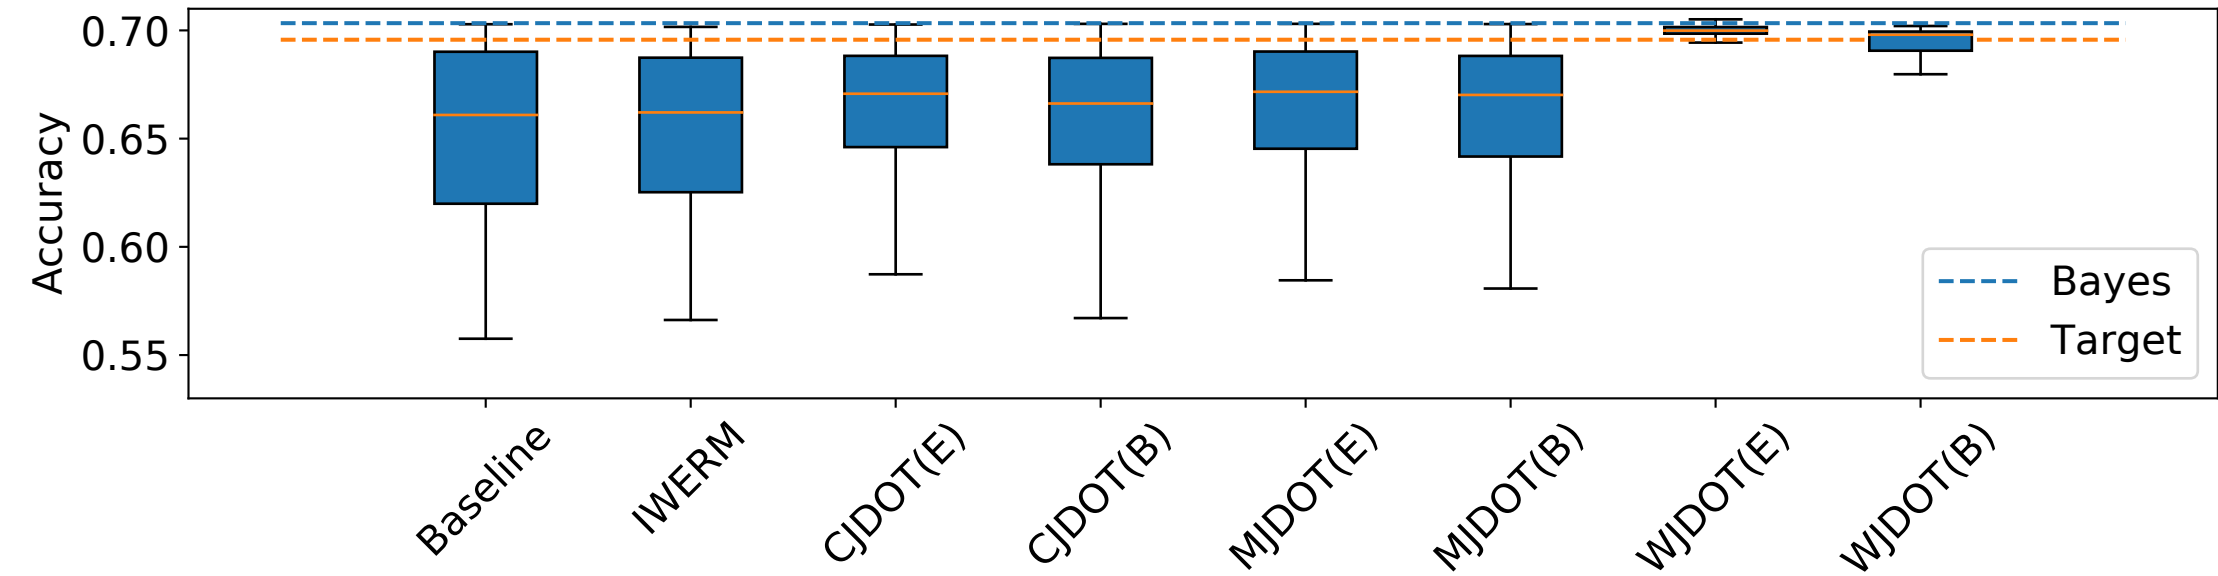

Supplement: supplementary_material [file attachment]

MSDA-WJDOT(E)

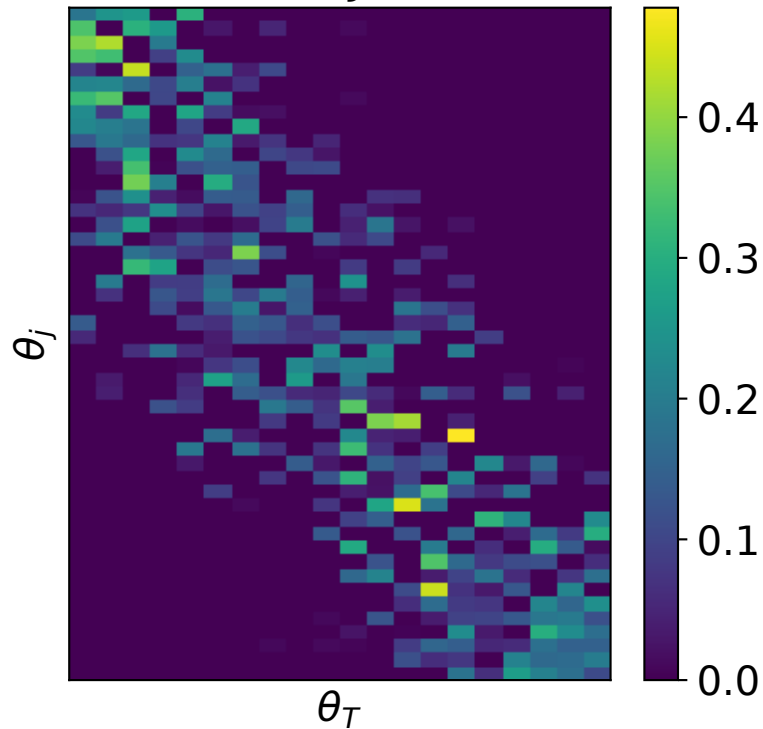

MSDA-WJDOT(B)

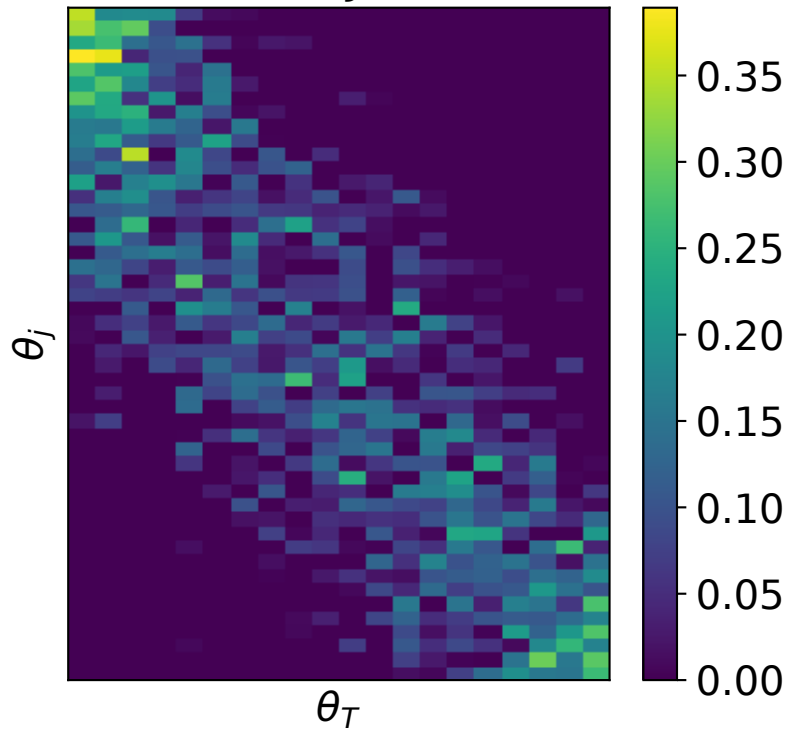

Supplement: supplementary_material [file attachment]

Loss function

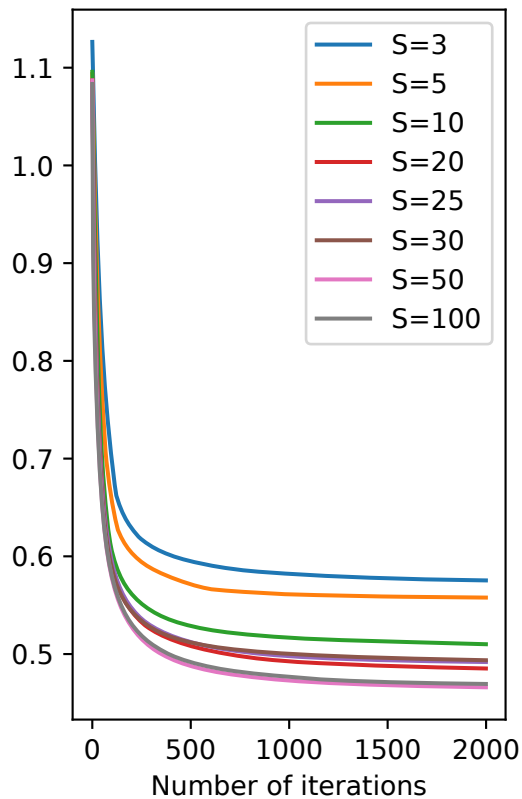 $\alpha$  sparsity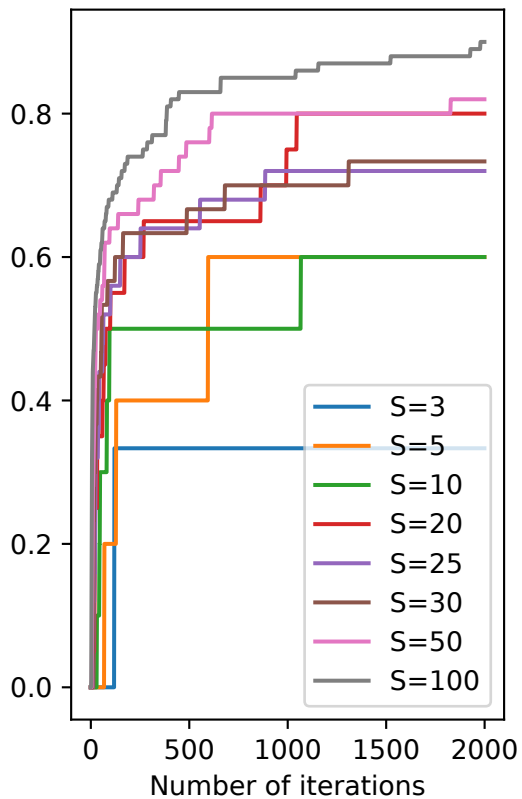

Supplement: supplementary_material [file attachment]

Data

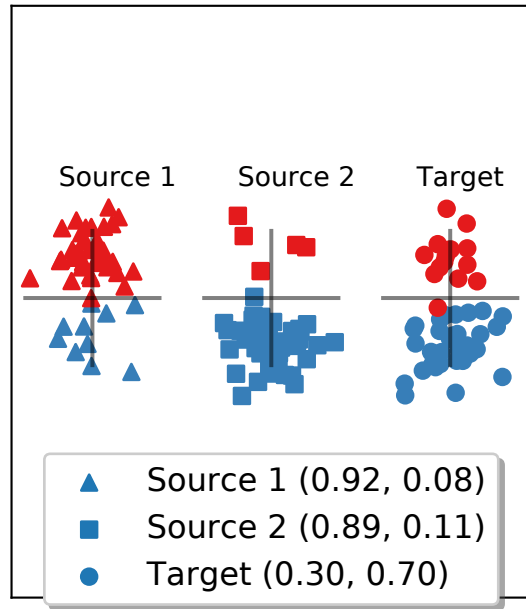

Weighted Sources and Classifier

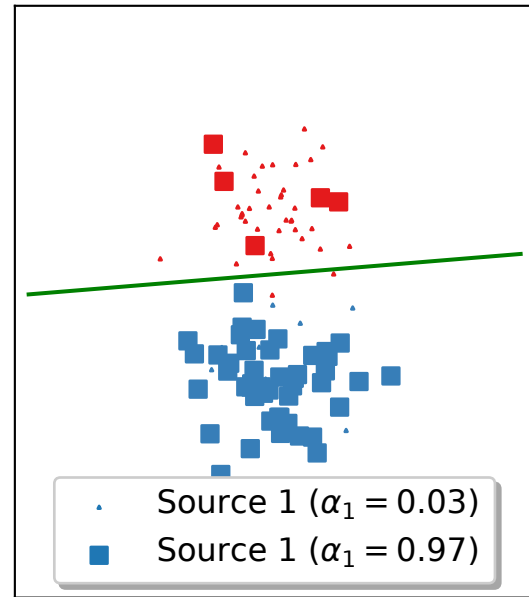

Accuracy

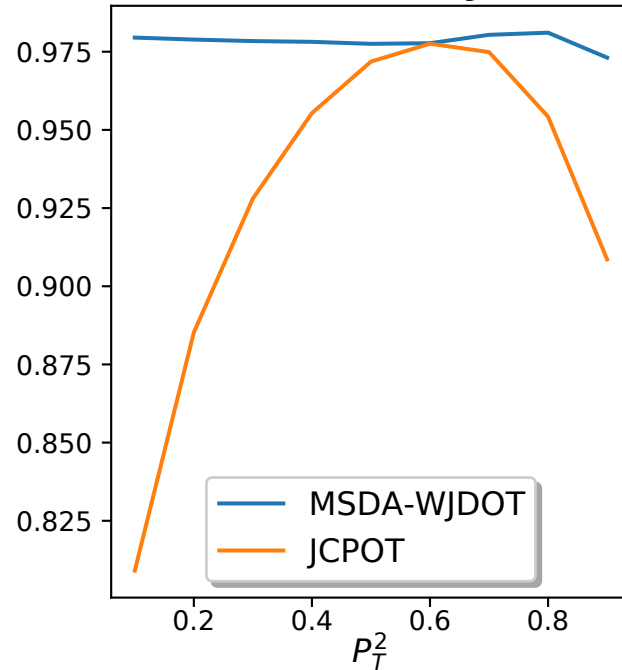 $\alpha$  coefficients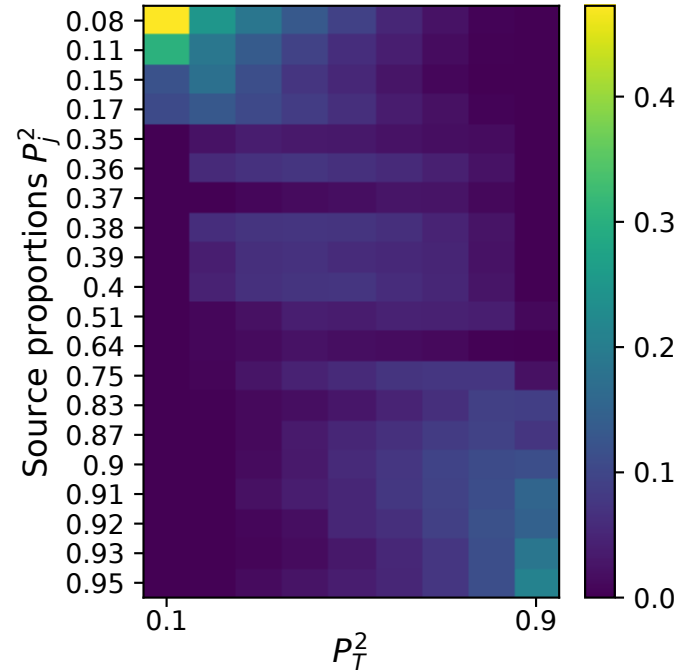

Supplement: supplementary_material [file attachment]

WJDOT(E)

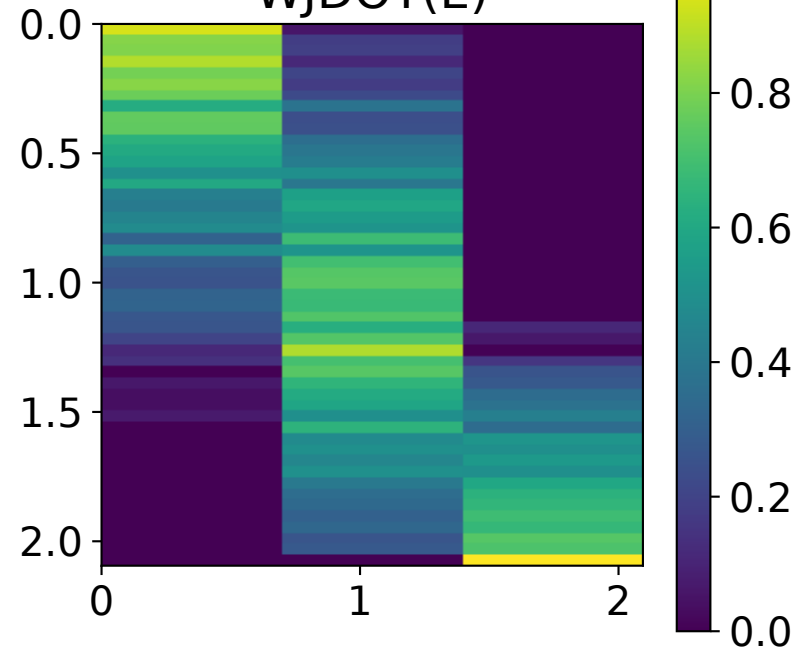

WJDOT(B)

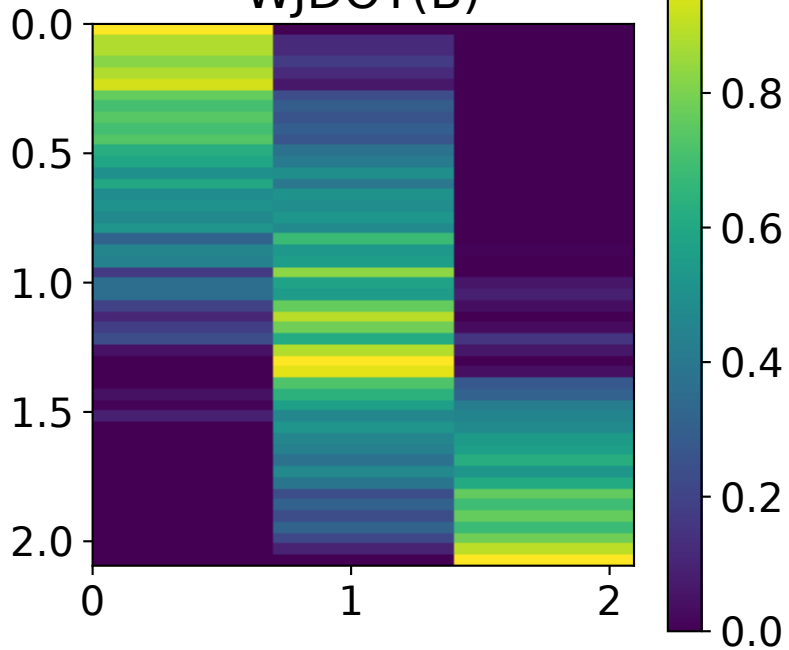

Supplement: supplementary_material [file attachment]
